# THE AMERICAN JOURNAL OF PSYCHIATRY

---

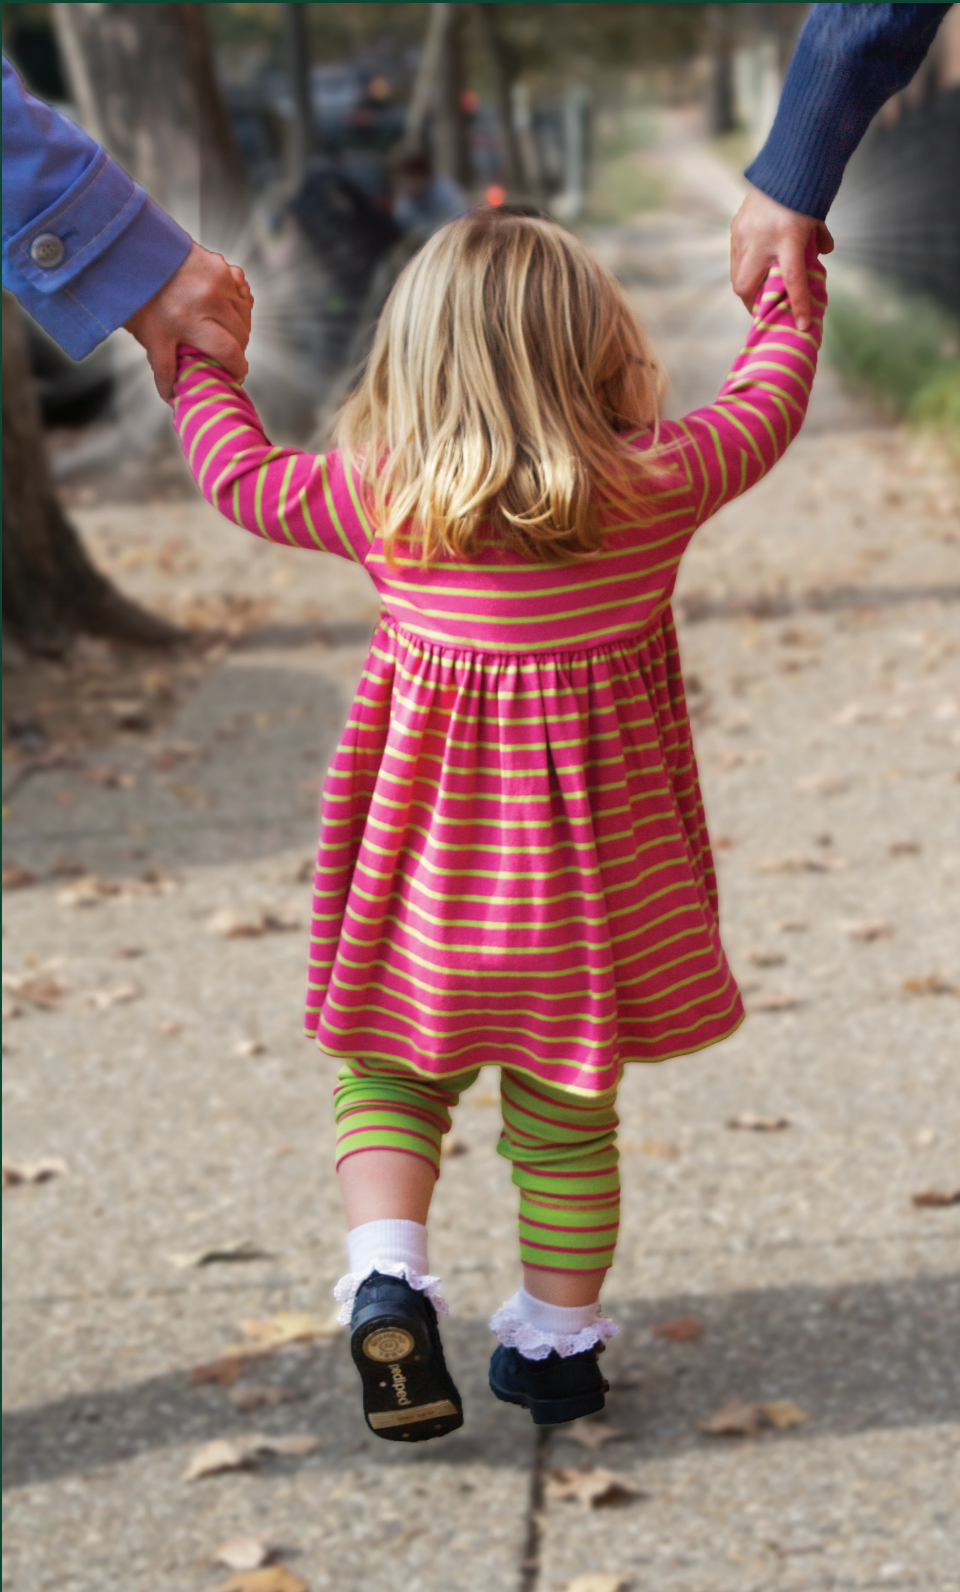

**Treatment for PTSD Related to  
Childhood Abuse: A Randomized  
Controlled Trial**

Marylene Cloitre, Ph.D., et al. 915

**Dysregulation of Regional  
Endogenous Opioid Function in  
Borderline Personality Disorder**

Alan R. Prossin, M.D., et al. 925

**Illness Risk Following Rapid  
Versus Gradual Discontinuation  
of Antidepressants**

Ross J. Baldessarini, M.D., et al. 934

**S-Adenosyl Methionine (SAME)  
Augmentation of Serotonin  
Reuptake Inhibitors for  
Antidepressant Nonresponders  
With Major Depressive Disorder:  
A Double-Blind, Randomized  
Clinical Trial**

George I. Papakostas, M.D., et al. 942

**Continuing Medical Education 1009**

**August 2010**

**Volume 167 • Number 8**

---

Official Journal of the  
AMERICAN PSYCHIATRIC ASSOCIATION

---

[ajp.psychiatryonline.org](http://ajp.psychiatryonline.org)
