*Symptoms of major depressive disorder (MDD) adapted from DSM-IV-TR<sup>1</sup>*



DEPRESSED MOOD



CHANGE IN SLEEP



FEELINGS OF GUILT



LACK OF ENERGY



LOSS OF INTEREST



SADNESS



When depression  
takes over

NEW FOR MDD

Introducing Once-daily OLEPTRO™

Treat Her Depression With

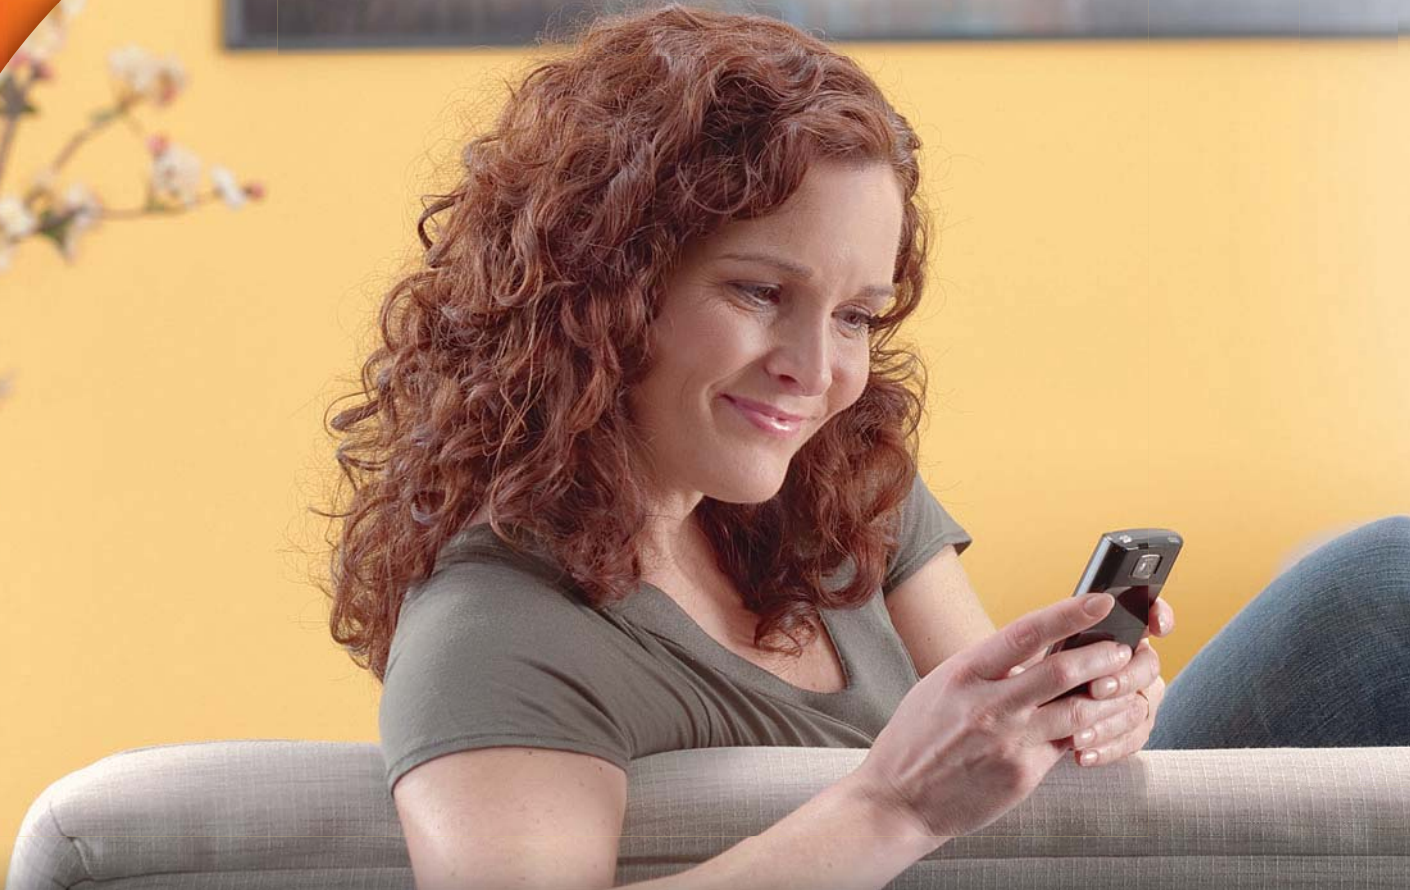

**WARNING: SUICIDALITY AND ANTIDEPRESSANT DRUGS** Antidepressants increased the risk compared to placebo of suicidal thinking and behavior (suicidality) in children, adolescents, and young adults in short-term studies of major depressive disorder (MDD) and other psychiatric disorders. Anyone considering the use of Oleptro or any other antidepressant in a child, adolescent or young adult must balance this risk with the clinical need. Short-term studies did not show an increase in the risk of suicidality with antidepressants compared to placebo in adults beyond age 24; there was a reduction in risk with antidepressants compared to placebo in adults aged 65 and older. Depression and certain other psychiatric disorders are themselves associated with increases in the risk of suicide. Patients of all ages who are started on antidepressant therapy should be monitored appropriately and observed closely for clinical worsening, suicidality, or unusual changes in behavior. Families and caregivers should be advised of the need for close observation and communication with the prescriber. Oleptro is not approved for use in pediatric patients.

#### IMPORTANT SAFETY INFORMATION

##### WARNINGS AND PRECAUTIONS

- **Clinical worsening and suicide risk:** All patients, whether adult or pediatric, being treated with antidepressants for both psychiatric and non-psychiatric disorders, should be monitored appropriately and observed closely for clinical worsening, suicidality, and unusual changes in behavior, especially during the initial few months of a course of drug therapy, or at times of dose changes, either increases or decreases.
- Families and caregivers of patients being treated with antidepressants for major depressive disorder or other indications, both psychiatric and non-psychiatric, should be alerted about the need to monitor patients for the emergence of anxiety, agitation, panic attacks, insomnia, irritability, hostility, aggressiveness, impulsivity, akathisia (psychomotor restlessness), hypomania and mania, unusual changes in behavior, as well as the emergence of suicidality, and to report such symptoms immediately to health care providers. Such monitoring should include daily observations by families and caregivers.
- **Serotonin syndrome or neuroleptic malignant syndrome (NMS)-like reactions:** The development of a potentially life-threatening serotonin syndrome or neuroleptic malignant syndrome (NMS)-like reactions has been reported with antidepressants, and may occur with OLEPTRO™, particularly with concomitant use of other serotonergic drugs including SSRIs, SNRIs and triptans.
- Treatment with OLEPTRO™ and any concomitant serotonergic or antidopaminergic agents, including antipsychotics, should be discontinued immediately and supportive treatment should be initiated. OLEPTRO™ should not be used within 14 days of an MAOI.
- **Screening patients for bipolar disorder and monitoring for mania/hypomania:** A major depressive episode may be the initial presentation of bipolar disorder. Prior to initiating treatment, patients should be adequately screened to determine if they are at risk for bipolar disorder and monitored for mania/hypomania. OLEPTRO™ is not approved for use in treating bipolar depression.
- **QT prolongation and risk of sudden death:** Trazodone is known to prolong QT/QTc interval. Some drugs that cause QT prolongation may lead to Torsades de Pointes and even death especially in susceptible individuals, such as those with hypokalemia, hypomagnesemia, or a genetic predisposition to prolonged QT/QTc. There have been post-marketing reports of Torsades de Pointes with immediate release trazodone even at doses of 100 mg per day or less.
- **Use in patients with heart disease:** Caution should be used when administering OLEPTRO™ to patients with cardiac disease and such patients should be closely monitored, since antidepressant drugs (including trazodone hydrochloride) may cause cardiac arrhythmias. Concomitant administration of drugs that prolong the QT interval or that are inhibitors of CYP3A4 may increase the risk of cardiac arrhythmia in these patients. Trazodone is not recommended for use during the initial recovery phase of myocardial infarction.

Once-daily

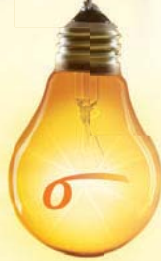

# Oleptro™

(trazodone hydrochloride) | 150 mg  
extended-release tablets | 300 mg

- Significant improvement in mean HAMD-17 total score as early as week 1 and throughout an 8-week clinical study vs placebo ( $P < 0.05$ )<sup>2,3</sup>
  - Full antidepressant effect may take 4 to 6 weeks
- In the clinical study, no notable impact on weight and low incidence of sexual dysfunction<sup>2-4</sup>
- Controlled release over 24 hours<sup>2-4</sup>
- Once-daily dosing in the evening<sup>4</sup>

**OLEPTRO™ is indicated for the treatment of major depressive disorder (MDD) in adults. The efficacy of OLEPTRO™ has been established in a trial of outpatients with MDD as well as in trials with the immediate-release formulation of trazodone.**

Please see Important Safety Information below, including Boxed Warning, and accompanying Brief Summary.

- **Orthostatic hypotension and syncope:** Orthostatic hypotension and syncope have been reported in patients receiving trazodone hydrochloride. Concomitant use with an antidepressant drug may require a reduction in the dose of the antihypertensive drug.
- **Abnormal bleeding:** Drugs that interfere with serotonin reuptake, including trazodone hydrochloride, may increase the risk of bleeding events. Concomitant use with NSAIDs, aspirin, or other drugs that affect coagulation may compound this risk.
- **Interaction with MAOIs:** Serious, sometimes fatal, reactions have been reported when serotonergic drugs are used in combination with monoamine oxidase inhibitor(s). Therefore, OLEPTRO™ should not be used concomitantly or within 14 days of monoamine oxidase inhibitors.
- **Priapism:** Rarely, cases of priapism (painful erections lasting more than 6 hours) can occur in men receiving trazodone. Priapism, if not treated promptly, can result in irreversible damage to the erectile tissue. Trazodone should be used with caution in men who have conditions that might predispose them to priapism (e.g., sickle cell anemia, multiple myeloma, or leukemia), or in men with anatomical deformation of the penis (e.g., angulation, cavernosal fibrosis, or Peyronie's disease). Men who have an erection lasting greater than 6 hours, whether painful or not, should immediately discontinue the drug and seek medical attention. OLEPTRO™ should be used with caution in men who have predisposing conditions.
- **Hyponatremia:** There is a risk of hyponatremia when taking antidepressants. Elderly patients may be at greater risk, as well as patients taking diuretics or who are volume-depleted. Discontinuation of OLEPTRO™ should be considered in patients with symptomatic hyponatremia and appropriate medical intervention should be initiated.
- **Potential for cognitive and motor impairment:** OLEPTRO™ may cause somnolence or sedation and may impair the mental and/or physical ability required for the performance of potentially hazardous tasks. Patients should be cautioned about operating hazardous machinery, including automobiles, until they are reasonably certain the drug treatment does not affect them adversely.
- **Discontinuation Symptoms:** Withdrawal symptoms including anxiety, agitation and sleep disturbances, have been reported with trazodone. Clinical experience suggests that the dose should be gradually reduced before complete discontinuation of the treatment.
- **Pregnancy Category C:** OLEPTRO™ should be used during pregnancy only if the potential benefit justifies the potential risk to the fetus.

#### ADVERSE REACTIONS

The most common adverse reactions (incidence greater than or equal to five percent and twice that of placebo) are: somnolence/sedation, dizziness, constipation, blurred vision.

These are not all the possible adverse events of OLEPTRO™.

#### DRUG INTERACTIONS

- MAOIs: MAOIs should not be used within 14 days of OLEPTRO™.
- CNS Depressants: Trazodone may enhance effects of alcohol, barbiturates, or other CNS depressants.
- CYP3A4 Inhibitors: May necessitate a lower dose of OLEPTRO™.
- CYP3A4 Inducers: (e.g., carbamazepine): May necessitate a higher dose of OLEPTRO™.
- Digoxin or Phenytoin: Monitor for increased serum levels.
- Serotonergic Medications: Serotonin syndrome has been reported.
- NSAIDs, Aspirin, or Other Anticoagulants: Potential for increased risk of bleeding.
- Warfarin: Monitor for increased or decreased prothrombin time.

**References:** 1. American Psychiatric Association. *Diagnostic and Statistical Manual of Mental Disorders*, Fourth Edition, Text Revision. Washington, DC: American Psychiatric Association, 2000. 2. Sheehan DV, Croft HA, Gossen ER, et al. Extended-release trazodone in major depressive disorder: a randomized, double-blind, placebo-controlled study. *Psychiatry*. 2009;6(5):20-33. 3. Data on file, Labopharm Inc. 4. OLEPTRO™ Prescribing Information.

Visit the OLEPTRO™ website at  
[www.oleptro.com](http://www.oleptro.com) or call 1-877-345-6177.

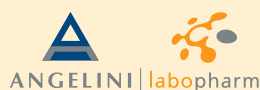

OLEPTRO is a trademark of Labopharm Inc.

© 2010, Angelini Labopharm.  
All rights reserved. OLP0004 7/10

**OLEPTRO™ (trazodone hydrochloride) extended-release tablets**

**Rx Only**

Brief summary: for complete details, please see full Prescribing Information for Olepro.

**WARNING: SUICIDALITY AND ANTIDEPRESSANT DRUGS**  
Antidepressants increased the risk compared to placebo of suicidal thinking and behavior (suicidality) in children, adolescents, and young adults in short-term studies of major depressive disorder (MDD) and other psychiatric disorders. Anyone considering the use of Olepro or any other antidepressant in a child, adolescent, or young adult must balance this risk with the clinical need. Short-term studies did not show an increase in the risk of suicidality with antidepressants compared to placebo in adults beyond age 24; there was a reduction in risk with antidepressants compared to placebo in adults aged 65 and older. Depression and certain other psychiatric disorders are themselves associated with increases in the risk of suicide. Patients of all ages who are started on antidepressant therapy should be monitored appropriately and observed closely for clinical worsening, suicidality, or unusual changes in behavior. Families and caregivers should be advised of the need for close observation and communication with the prescriber. Olepro is not approved for use in pediatric patients [see **Warnings and Precautions and Patient Counseling Information**].

**INDICATIONS AND USAGE:** Olepro™ is indicated for the treatment of major depressive disorder (MDD) in adults. The efficacy of Olepro has been established in a trial of outpatients with MDD as well as in trials with the immediate release formulation of trazodone [see **Clinical Studies**].

**CONTRAINDICATIONS:** None.

**WARNINGS AND PRECAUTIONS: Clinical Worsening and Suicide Risk** – Patients with major depressive disorder (MDD), both adult and pediatric, may experience worsening of their depression and/or the emergence of suicidal ideation and behavior (suicidality) or unusual changes in behavior, whether or not they are taking antidepressant medications, and this risk may persist until significant remission occurs. Suicide is a known risk of depression and certain other psychiatric disorders and these disorders themselves are the strongest predictors of suicide. There has been a long standing concern, however, that antidepressants may have a role in inducing worsening of depression and the emergence of suicidality in certain patients during the early phases of treatment. Pooled analyses of short-term placebo-controlled trials of antidepressant drugs (SSRIs and others) showed that these drugs increase the risk of suicidal thinking and behavior (suicidality) in children, adolescents, and young adults (ages 18 – 24) with MDD and other psychiatric disorders. Short-term studies did not show an increase in the risk of suicidality with antidepressants compared to placebo in adults beyond age 24; there was a reduction with antidepressants compared to placebo in adults aged 65 and older. The pooled analyses of placebo-controlled trials in children and adolescents with MDD, obsessive compulsive disorder (OCD), or other psychiatric disorders included a total of 24 short-term trials of 9 antidepressant drugs in over 4,400 patients. The pooled analyses of placebo-controlled trials in adults with MDD or other psychiatric disorders included a total of 295 short-term trials (median duration of 2 months) of 11 antidepressant drugs in over 77,000 patients. There was considerable variation in risk of suicidality among drugs, but a tendency toward an increase in the younger patients for almost all drugs studied. There were differences in absolute risk of suicidality across the different indications, with the highest incidence in MDD. The risk differences (drug vs. placebo), however, were relatively stable within age strata and across indications. These risk differences (drug-placebo difference in the number of cases of suicidality per 1,000 patients treated) are provided in Table 1.

| Age Range | Increases Compared to Placebo |
|-----------|-------------------------------|
| < 18      | 14 additional cases           |
| 18 – 24   | 5 additional cases            |
|           | Decreases Compared to Placebo |
| 25 – 64   | 1 fewer case                  |
| ≥ 65      | 6 fewer cases                 |

No suicides occurred in any of the pediatric trials. There were suicides in the adult trials, but the number was not sufficient to reach any conclusion about drug effect on suicide. It is unknown whether the suicidality risk extends to longer-term use, i.e., beyond

several months. However, there is substantial evidence from placebo-controlled maintenance trials in adults with depression that the use of antidepressants can delay the recurrence of depression. **All patients being treated with antidepressants for any indication should be monitored appropriately and observed closely for clinical worsening, suicidality, and unusual changes in behavior, especially during the initial few months of a course of drug therapy, or at times of dose changes, either increases or decreases.** The following symptoms, anxiety, agitation, panic attacks, insomnia, irritability, hostility, aggressiveness, impulsivity, akathisia (psychomotor restlessness), hypomania, and mania, have been reported in adult and pediatric patients being treated with antidepressants for major depressive disorder as well as for other indications, both psychiatric and nonpsychiatric. Although a causal link between the emergence of such symptoms and either the worsening of depression and/or the emergence of suicidal impulses has not been established, there is concern that such symptoms may represent precursors to emerging suicidality. Consideration should be given to changing the therapeutic regimen, including possibly discontinuing the medication, in patients whose depression is persistently worse, or who are experiencing emergent suicidality or symptoms that might be precursors to worsening depression or suicidality, especially if these symptoms are severe, abrupt in onset, or were not part of the patient's presenting symptoms. **Families and caregivers of patients being treated with antidepressants for major depressive disorder or other indications, both psychiatric and nonpsychiatric, should be alerted about the need to monitor patients for the emergence of agitation, irritability, unusual changes in behavior, and the other symptoms described above, as well as the emergence of suicidality, and to report such symptoms immediately to health care providers. Such monitoring should include daily observation by families and caregivers.** Prescriptions for Olepro should be written for the smallest quantity of tablets consistent with good patient management, in order to reduce the risk of overdose. **Serotonin Syndrome or Neuroleptic Malignant Syndrome (NMS)-like Reactions** – The development of a potentially life-threatening serotonin syndrome or neuroleptic malignant syndrome (NMS)-like reactions have been reported with antidepressants alone and may occur with trazodone treatment, but particularly with concomitant use of other serotonergic drugs (including SSRIs, SNRIs and triptans) and with drugs that impair metabolism of serotonin (including monoamine oxidase inhibitors [MAOIs]), or with antipsychotics or other dopamine antagonists. Serotonin syndrome symptoms may include mental status changes (e.g., agitation, hallucinations, and coma), autonomic instability (e.g., tachycardia, labile blood pressure, and hyperthermia), neuromuscular aberrations (e.g., hyperreflexia, incoordination) and/or gastrointestinal symptoms (e.g., nausea, vomiting, and diarrhea). Serotonin syndrome, in its most severe form, can resemble neuroleptic malignant syndrome, which includes hyperthermia, muscle rigidity, autonomic instability with possible rapid fluctuation of vital signs, and mental status changes. Treatment with Olepro and any concomitant serotonergic or antidopaminergic agents, including antipsychotics, should be discontinued immediately if the above reactions occur and supportive symptomatic treatment should be initiated. Olepro should not be used within 14 days of an MAOI [see **Warnings and Precautions and Drug Interactions**]. If concomitant treatment with Olepro and an SSRI, SNRI or a 5-hydroxytryptamine receptor agonist (triptan) is clinically warranted, careful observation of the patient is advised, particularly during treatment initiation and dose increases. The concomitant use of Olepro with serotonin precursors (such as tryptophan) is not recommended. **Screening Patients for Bipolar Disorder and Monitoring for Mania/Hypomania** – A major depressive episode may be the initial presentation of bipolar disorder. It is generally believed (though not established in controlled trials) that treating such an episode with an antidepressant alone may increase the likelihood of precipitation of a mixed/manic episode in patients at risk for bipolar disorder. Whether any of the symptoms described for clinical worsening and suicide risk represent such a conversion is unknown. However, prior to initiating treatment with an antidepressant, patients with depressive symptoms should be adequately screened to determine if they are at risk for bipolar disorder; such screening should include a detailed psychiatric history, including a family history of suicide, bipolar disorder, and depression. It should be noted that Olepro is not approved for use in treating bipolar depression. **QT Prolongation and Risk of Sudden Death** – Trazodone is known to prolong the QT/QTc interval. Some drugs that prolong the QT/QTc interval can cause Torsades de Pointes with sudden, unexplained death. The relationship of QT prolongation is clearest for larger increases (20 msec and greater), but it is possible that smaller QT/QTc prolongations may also increase risk, especially in susceptible individuals, such as those with hypokalemia, hypomagnesemia, or a genetic predisposition to prolonged QT/QTc. Although Torsades de Pointes has not been observed with the use of Olepro at recommended doses in premarketing trials, experience is too limited to rule out an

increased risk. However, there have been postmarketing reports of Torsades de Pointes with the immediate-release form of trazodone (in the presence of multiple confounding factors), even at doses of 100 mg per day or less. **Use in Patients with Heart Disease** – Trazodone hydrochloride is not recommended for use during the initial recovery phase of myocardial infarction. Caution should be used when administering Olepro to patients with cardiac disease and such patients should be closely monitored, since antidepressant drugs (including trazodone hydrochloride) may cause cardiac arrhythmias. QT prolongation has been reported with trazodone therapy [see **Warnings and Precautions**]. Clinical studies in patients with pre-existing cardiac disease indicate that trazodone hydrochloride may be arrhythmogenic in some patients in that population. Arrhythmias identified include isolated PVCs, ventricular couplets, tachycardia with syncope, and Torsades de Pointes. Postmarketing events have been reported at doses of 100 mg or less with the immediate-release form of trazodone. Concomitant administration of drugs that prolong the QT interval or that are inhibitors of CYP3A4 may increase the risk of cardiac arrhythmia. **Orthostatic Hypotension and Syncope** – Hypotension, including orthostatic hypotension and syncope has been reported in patients receiving trazodone hydrochloride. Concomitant use with an antihypertensive may require a reduction in the dose of the antihypertensive drug. **Abnormal Bleeding** – Postmarketing data have shown an association between use of drugs that interfere with serotonin reuptake and the occurrence of gastrointestinal (GI) bleeding. While no association between trazodone and bleeding events, in particular GI bleeding, was shown, patients should be cautioned about potential risk of bleeding associated with the concomitant use of trazodone and NSAIDs, aspirin, or other drugs that affect coagulation or bleeding. Other bleeding events related to SSRIs and SNRIs have ranged from ecchymosis, hematoma, epistaxis, and petechiae to life-threatening hemorrhages. **Interaction with MAOIs** – In patients receiving serotonergic drugs in combination with a monoamine oxidase inhibitor (MAOI), there have been reports of serious, sometimes fatal reactions including hyperthermia, rigidity, myoclonus, autonomic instability with rapid fluctuation in vital signs, and mental status changes that include extreme agitation progressing to delirium and coma. These reactions have also been reported in patients who have recently discontinued antidepressant treatment and have been started on an MAOI. Some cases presented with features resembling neuroleptic malignant syndrome. Furthermore, limited animal data on the effects of combined use of serotonergic antidepressants and MAOIs suggest that these drugs may act synergistically to elevate blood pressure and evoke behavioral excitation. Therefore, it is recommended that Olepro should not be used in combination with an MAOI or within 14 days of discontinuing treatment with an MAOI. Similarly, at least 14 days should be allowed after stopping Olepro before starting an MAOI. **Priapism** – Rare cases of priapism (painful erections greater than 6 hours in duration) were reported in men receiving trazodone. Priapism, if not treated promptly, can result in irreversible damage to the erectile tissue. Men who have an erection lasting greater than 6 hours, whether painful or not, should immediately discontinue the drug and seek emergency medical attention [see **Adverse Reactions and Overdosage**]. Trazodone should be used with caution in men who have conditions that might predispose them to priapism (e.g., sickle cell anemia, multiple myeloma, or leukemia), or in men with anatomical deformation of the penis (e.g., angulation, cavernosal fibrosis, or Peyronie's disease). **Hyponatremia** – Hyponatremia may occur as a result of treatment with antidepressants. In many cases, this hyponatremia appears to be the result of the syndrome of inappropriate antidiuretic hormone secretion (SIADH). Cases with serum sodium lower than 110 mmol/L have been reported. Elderly patients may be at greater risk of developing hyponatremia with antidepressants. Also, patients taking diuretics or who are otherwise volume-depleted can be at greater risk. Discontinuation of Olepro should be considered in patients with symptomatic hyponatremia and appropriate medical intervention should be instituted. Signs and symptoms of hyponatremia include headache, difficulty concentrating, memory impairment, confusion, weakness, and unsteadiness, which can lead to falls. Signs and symptoms associated with more severe and/or acute cases have included hallucination, syncope, seizure, coma, respiratory arrest, and death. **Potential for Cognitive and Motor Impairment** – Olepro may cause somnolence or sedation and may impair the mental and/or physical ability required for the performance of potentially hazardous tasks. Patients should be cautioned about operating hazardous machinery, including automobiles, until they are reasonably certain that the drug treatment does not affect them adversely. **Discontinuation Symptoms** – Withdrawal symptoms including anxiety, agitation and sleep disturbances, have been reported with trazodone. Clinical experience suggests that the dose should be gradually reduced before complete discontinuation of the treatment.

**ADVERSE REACTIONS:** The following serious adverse reactions are described elsewhere in the labeling: Clinical Worsening and Suicide Risk [see **Boxed Warning and Warnings and**

**Precautions;** Serotonin Syndrome or NMS-like Reactions [see **Warnings and Precautions**]; QT Prolongation and Risk of Sudden Death [see **Warnings and Precautions**]; Orthostatic Hypotension [see **Warnings and Precautions**]; Abnormal bleeding events [see **Warnings and Precautions**]; Priapism [see **Warnings and Precautions**]; Hyponatremia [see **Warnings and Precautions**]; Cognitive and Motor Impairment [see **Warnings and Precautions**]; Discontinuation symptoms [see **Warnings and Precautions**]. The most common adverse reactions (reported in  $\geq 5\%$  and at twice the rate of placebo) are: somnolence/sedation, dizziness, constipation, vision blurred. Table 2 presents the summary of adverse events (AEs) leading to discontinuation of Olepro treatment with an incidence of at least 1% and at least twice that for placebo.

|                                     | Olepro<br>N = 202 |
|-------------------------------------|-------------------|
| Somnolence/Sedation                 | 8 (4.0%)          |
| Dizziness                           | 7 (3.5%)          |
| Confusional state                   | 2 (1.0%)          |
| Coordination abnormal               | 2 (1.0%)          |
| Headache                            | 2 (1.0%)          |
| Nausea                              | 2 (1.0%)          |
| Balance disorder / Gait disturbance | 2 (1.0%)          |

**Clinical Studies Experience** – The data described below reflects exposure in a clinical trial of 406 patients, including 204 exposed to placebo and 202 exposed to Olepro. Patients were between 18-80 years of age and 69.3% and 67.5% of patients had at least one previous episode of depression in the last 24 months in the placebo and active-treated group, respectively. In individual patients, doses were flexible and ranged from 150 to 375 mg per day. The mean daily dose during the 6-week treatment period was 310 mg. The tablets were administered orally and were given once a day for a total duration of 8 weeks, including the titration period. Because clinical trials are conducted under widely varying conditions, adverse reaction rates observed in the clinical trials of a drug cannot be directly compared to rates in the clinical trials of another drug and may not reflect the rates observed in practice. Table 3 presents the summary of all treatment emergent AEs that occurred at an incidence of  $\geq 5\%$  in the Olepro group, whether considered by the clinical investigator to be related to the study drug or not.

| Preferred Term      | Placebo<br>N = 204 | Olepro<br>N = 202 |
|---------------------|--------------------|-------------------|
| Somnolence/Sedation | 39 (19%)           | 93 (46%)          |
| Headache            | 55 (27%)           | 67 (33%)          |
| Dry mouth           | 26 (13%)           | 51 (25%)          |
| Dizziness           | 25 (12%)           | 50 (25%)          |
| Nausea              | 26 (13%)           | 42 (21%)          |
| Fatigue             | 17 (8%)            | 30 (15%)          |
| Diarrhea            | 23 (11%)           | 19 (9%)           |
| Constipation        | 4 (2%)             | 16 (8%)           |
| Back pain           | 7 (3%)             | 11 (5%)           |
| Vision blurred      | 0 (0%)             | 11 (5%)           |

**Sexual Dysfunction** – Adverse events related to sexual dysfunction (regardless of causality) were reported by 4.9% and 1.5% of patients treated with Olepro and placebo, respectively. In the Olepro group, ejaculation disorders occurred in 1.5% of patients, decreased libido occurred in 1.5% of patients, and erectile dysfunction and abnormal orgasm  $< 1\%$  of patients. **Vital Signs and Weight** – There were no notable changes in vital signs (blood pressure, respiratory rate, pulse) or weight in either treatment group. Following is a list of treatment-emergent adverse reactions with an incidence of  $\geq 1\%$  to  $< 5\%$  (i.e., less common) in patients treated with Olepro. This listing is not intended to include reactions (i) already listed in previous tables or elsewhere in the labeling (ii) for which the association with treatment is remote, (iii) which were so general as to be uninformative, and (iv) which were not considered to have significant clinical implications. Reactions are classified by body-system using the following definitions: frequent adverse reactions are those occurring in at least 1/100 patients; infrequent adverse reactions are those occurring in less than 1/100 patients. **Ear and**

**Labyrinth Disorders** – *Infrequent*: hypoacusis, tinnitus, vertigo; **Eye Disorders** – *Frequent*: visual disturbance; *Infrequent*: dry eye, eye pain, photophobia; **Gastrointestinal Disorders** – *Frequent*: abdominal pain, vomiting; *Infrequent*: reflux esophagitis; **General Disorders and Administration Site Conditions** – *Frequent*: edema; *Infrequent*: gait disturbance; **Immune System Disorders** – *Infrequent*: hypersensitivity; **Musculoskeletal and Connective Tissue Disorders** – *Frequent*: musculoskeletal complaints, myalgia; *Infrequent*: muscle twitching; **Nervous System Disorders** – *Frequent*: coordination abnormal, dysgeusia, memory impairment, migraine, paraesthesia, tremor; *Infrequent*: amnesia, aphasia, hypoesthesia, speech disorder; **Psychiatric Disorders** – *Frequent*: agitation, confusional state, disorientation; **Renal and Urinary Disorders** – *Frequent*: micturition urgency; *Infrequent*: bladder pain, urinary incontinence; **Respiratory, Thoracic and Mediastinal Disorders** – *Frequent*: dyspnea; **Skin and Subcutaneous Tissue Disorders** – *Frequent*: night sweats; *Infrequent*: acne, hyperhidrosis, photosensitivity reaction; **Vascular Disorders** – *Infrequent*: flushing. **Postmarketing Experience** – Spontaneous reports regarding trazodone hydrochloride received from postmarketing experience include the following: abnormal dreams, agitation, alopecia, anxiety, aphasia, apnea, ataxia, breast enlargement or engorgement, cardiospasm, cerebrovascular accident, chills, cholestasis, clitorism, congestive heart failure, diplopia, edema, extrapyramidal symptoms, grand mal seizures, hallucinations, hemolytic anemia, hirsutism, hyperbilirubinemia, increased amylase, increased salivation, insomnia, leukocytosis, leukonychia, jaundice, lactation, liver enzyme alterations, methemoglobinemia, nausea/ vomiting (most frequently), paresthesia, paranoid reaction, priapism [see **Warnings and Precautions and Patient Counseling Information**], pruritus, psoriasis, psychosis, rash, stupor, inappropriate ADH syndrome, tardive dyskinesia, unexplained death, urinary incontinence, urinary retention, urticaria, vasodilation, vertigo, and weakness. Cardiovascular system effects which have been reported include the following: conduction block, orthostatic hypotension and syncope, palpitations, bradycardia, atrial fibrillation, myocardial infarction, cardiac arrest, arrhythmia, ventricular ectopic activity, including ventricular tachycardia and QT prolongation. In postmarketing surveillance, prolonged QT interval, Torsades de Pointes, and ventricular tachycardia have been reported with the immediate-release form of trazodone at doses of 100 mg per day or less [see **Warnings and Precautions**].

**DRUG INTERACTIONS: MAOIs** – MAOIs should not be used within 14 days of Olepro [see **Warnings and Precautions**]. **Central Nervous System (CNS) Depressants** – Trazodone may enhance the response to alcohol, barbiturates, and other CNS depressants. **Cytochrome P450 3A4 Inhibitors** – In vitro drug metabolism studies suggest that there is a potential for drug interactions when trazodone is given with cytochrome P450 3A4 (CYP3A4) inhibitors. The effect of short-term administration of ritonavir (200 mg twice daily, 4 doses) on the pharmacokinetics of a single dose of trazodone (50 mg) has been studied in 10 healthy subjects. The C<sub>max</sub> of trazodone increased by 34%, the AUC increased 2.4-fold, the half-life increased by 2.2-fold, and the clearance decreased by 52%. Adverse effects including nausea, hypotension, and syncope were observed when ritonavir and trazodone were co-administered. It is likely that ketoconazole, indinavir, and other CYP3A4 inhibitors such as itraconazole may lead to substantial increases in trazodone plasma concentrations with the potential for adverse effects. If trazodone is used with a potent CYP3A4 inhibitor, the risk of cardiac arrhythmia may be increased [see **Warnings and Precautions**] and a lower dose of trazodone should be considered. **Cytochrome P450 Inducers (e.g., carbamazepine)** – Carbamazepine induces CYP3A4. Following co-administration of carbamazepine 400 mg per day with trazodone 100 mg to 300 mg daily, carbamazepine reduced plasma concentrations of trazodone and m-chlorophenylpiperazine (an active metabolite) by 76% and 60% respectively, compared to pre-carbamazepine values. Patients should be closely monitored to see if there is a need for an increased dose of trazodone when taking both drugs. **Digoxin and Phenytoin** – Increased serum digoxin or phenytoin levels have been reported in patients receiving trazodone concurrently with either of these drugs. Monitor serum levels and adjust dosages as needed. **Serotonergic Drugs** – Based on the mechanism of action of Olepro and the potential for serotonin syndrome, caution is advised when Olepro is co-administered with other drugs that may affect the neurotransmitter systems [see **Warnings and Precautions**]. **NSAIDs, Aspirin, or Other Drugs Affecting Coagulation or Bleeding** – Due to a possible association between serotonin modulating drugs and gastrointestinal bleeding, patients should be monitored for and cautioned about the potential risk of bleeding associated with the concomitant use of trazodone and NSAIDs, aspirin, or other drugs that affect coagulation or bleeding [see **Warnings and Precautions**]. **Warfarin** – There have been reports of altered (either increased or decreased) prothrombin times in taking both warfarin and trazodone.

**USE IN SPECIFIC POPULATIONS: Pregnancy; Pregnancy Category C** – Trazodone hydrochloride has been shown to cause increased fetal resorption and other adverse effects on the fetus in

two studies using the rat when given at dose levels approximately 30 – 50 times the proposed maximum human dose. There was also an increase in congenital anomalies in one of three rabbit studies at approximately 15 – 50 times the maximum human dose. There are no adequate and well-controlled studies in pregnant women. Olepro should be used during pregnancy only if the potential benefit justifies the potential risk to the fetus. **Nursing Mothers** – Trazodone and/or its metabolites have been found in the milk of lactating rats, suggesting that the drug may be secreted in human milk. Caution should be exercised when Olepro is administered to a nursing woman. **Pediatric Use** – Safety and effectiveness in the pediatric population have not been established [see **Boxed Warning and Warnings and Precautions**]. Olepro should not be used in children or adolescents. **Geriatric Use** – Of 202 patients treated with Olepro in the clinical trial, there were 9 patients older than 65. No overall differences in safety or effectiveness were observed between these subjects and younger subjects, and other reported clinical literature and experience with trazodone have not identified differences in responses between elderly and younger patients. However, as experience in the elderly with Olepro is limited, it should be used with caution in geriatric patients. Antidepressants have been associated with cases of clinically significant hyponatremia in elderly patients who may be at greater risk for this adverse reaction [see **Warnings and Precautions**]. **Renal Impairment** – Olepro has not been studied in patients with renal impairment. Trazodone should be used with caution in this population. **Hepatic Impairment** – Olepro has not been studied in patients with hepatic impairment. Trazodone should be used with caution in this population.

**DRUG ABUSE AND DEPENDENCE: Controlled Substance** – Olepro is not a controlled substance. **Abuse** – Although trazodone hydrochloride has not been systematically studied in preclinical or clinical studies for its potential for abuse, no indication of drug-seeking behavior was seen in the clinical studies with Olepro. However, it is difficult to predict the extent to which a CNS-active drug will be misused, diverted, and abused. Consequently, physicians should carefully evaluate patients for a history of drug abuse and follow such patients closely, observing them for signs of misuse or abuse of trazodone hydrochloride (e.g., development of tolerance, incrementation of dose, drug-seeking behavior).

**OVERDOSAGE: Human Experience** – It is expected that the health risks associated with overdose of Olepro are most likely similar to those for trazodone immediate-release formulations. Death from overdose has occurred in patients ingesting trazodone and other CNS depressant drugs concurrently (alcohol; alcohol and chloral hydrate and diazepam; amobarbital; chlorthalidopexide; or meprobamate). The most severe reactions reported to have occurred with overdose of trazodone alone have been priapism, respiratory arrest, seizures, and ECG changes, including QT prolongation. The reactions reported most frequently have been drowsiness and vomiting. Overdosage may cause an increase in incidence or severity of any of the reported adverse reactions.

**Management of Overdose** – There is no specific antidote for Olepro overdose. Treatment should consist of those general measures employed in the management of overdosage with any drug effective in the treatment of major depressive disorder. Ensure an adequate airway, oxygenation and ventilation. Monitor cardiac rhythm and vital signs. General supportive and symptomatic measures are also recommended. Induction of emesis is not recommended. Gastric lavage with a large bore orogastric tube with appropriate airway protection, if needed, may be indicated if performed soon after ingestion, or in symptomatic patients. Activated charcoal should be administered. Forced diuresis may be useful in facilitating elimination of the drug. In managing overdosage, consider the possibility of multiple drug involvement. The physician should consider contacting a poison control center for additional information on the treatment of any overdose.

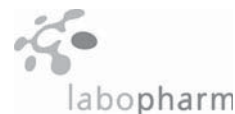

Labopharm Europe Limited  
Unit 5, The Seapoint Building  
44/45 Clontarf Road, Dublin 3, IRELAND

Olepro™ is a registered trademark of Labopharm Inc.  
Contramid® is a registered trademark of Labopharm Inc.  
© 2010, Labopharm Europe Limited  
All rights reserved. OLP 0009 7/10  
[February 2010]

# What mental health journal is the highest-ranked policy and services journal?

The 2009 impact factors have been released.

***Psychiatric Services* ranks 5th out of 49 journals in the Health Policy & Services Category.**

***No other mental health services journal ranks higher!\****

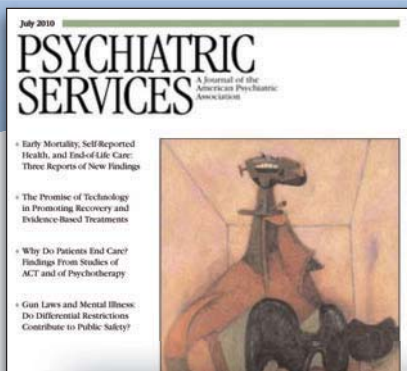

**One low price covers your print and online subscription. ✧**

**\$84 APA member print and online subscription. 25% Discount!**

**\$49 APA member online-only subscription. 50% Discount!**

**Order your subscription at [www.appi.org](http://www.appi.org)**

**✧ Includes APA International Members**

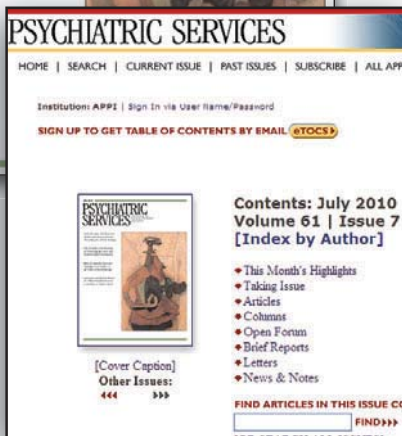

## Coming in the September issue:

- U.S. emergency department visits, 2001–2006: trends in visit duration
- Findings of a national metabolic screening program for psychiatric outpatients

## Coming in the October issue:

- Special section on outcomes of New York's assisted outpatient treatment program: evaluating the effects of Kendra's Law

*\*The four journals ranked higher than Psychiatric Services in this category (in rank order from #1): Milbank Quarterly, Health Affairs, Medical Care, and Value Health.*

**Don't miss another issue of *Psychiatric Services*.**

Subscribe today, visit [www.appi.org](http://www.appi.org) or call Customer Service at 1-800-368-5777

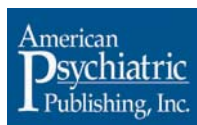

The *First* and *Last* Word in Psychiatry

[www.appi.org](http://www.appi.org) • 1-800-368-5777 • Fax: 703-907-1091 • Email: [appi@psych.org](mailto:appi@psych.org)

Priority Code AH1037

With the recommended starting dose —

SAPHRIS® delivers effective symptom control with documented safety and tolerability

SAPHRIS® is an atypical antipsychotic agent indicated for:

- Acute treatment of schizophrenia in adults
- Acute treatment of manic or mixed episodes associated with bipolar I disorder with or without psychotic features in adults

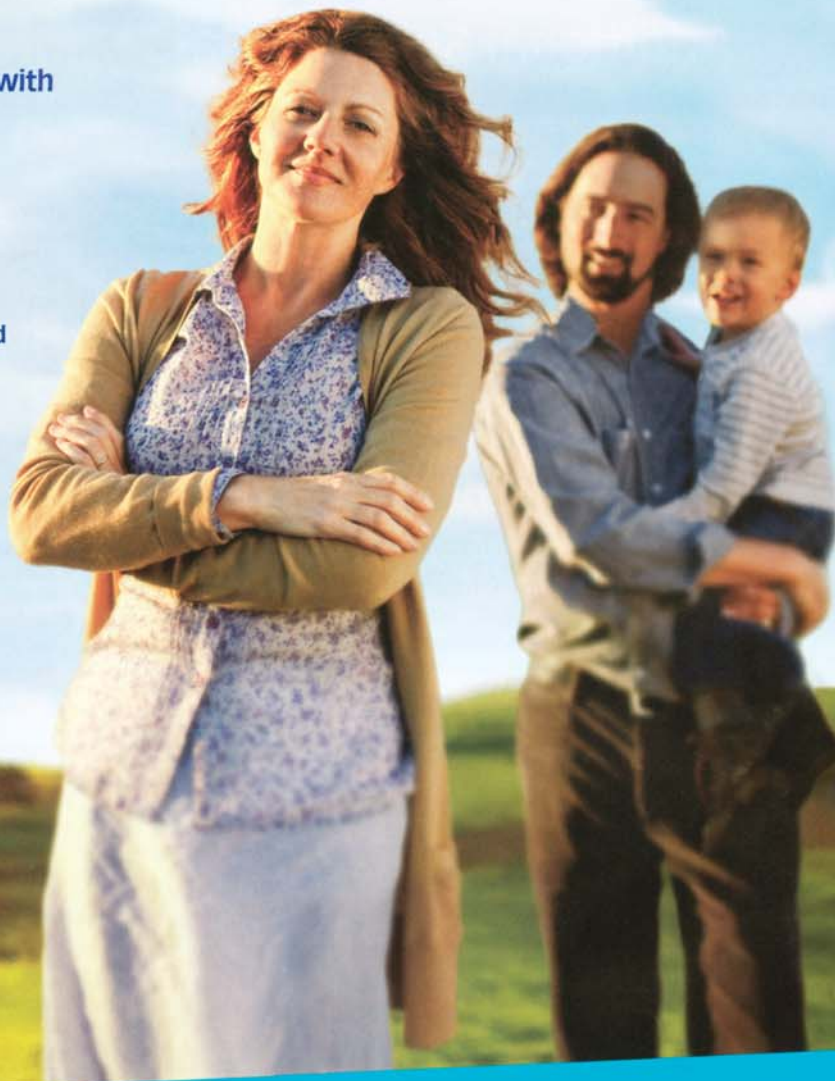

We have a lot to look forward to

## Selected Safety Information

### Increased Mortality in Elderly Patients With Dementia-Related Psychosis

- Elderly patients with dementia-related psychosis treated with antipsychotic drugs are at an increased risk of death
- Analyses of 17 placebo-controlled trials (modal duration of 10 weeks), largely in patients taking atypical antipsychotic drugs, revealed a risk of death in the drug-treated patients of between 1.6 to 1.7 times that seen in placebo-treated patients
- Over the course of a typical 10-week controlled trial, the rate of death in drug-treated patients was about 4.5% compared to a rate of 2.6% in the placebo group
- Although the causes of death were varied, most of the deaths appeared to be either cardiovascular (eg, heart failure, sudden death) or infectious (eg, pneumonia) in nature
- SAPHRIS® is not approved for the treatment of patients with dementia-related psychosis

### Cerebrovascular Adverse Events

- In placebo-controlled trials with risperidone, aripiprazole, and olanzapine in elderly subjects with dementia, there was a higher incidence of cerebrovascular adverse reactions (cerebrovascular accidents and transient ischemic attacks) including fatalities compared to placebo-treated subjects. SAPHRIS® is not approved for the treatment of patients with dementia-related psychosis

Please see additional Selected Safety Information continued on next page.

Please see accompanying brief summary of full Prescribing Information, including **BOXED WARNING**.

**Saphris**® (asenapine)  
sublingual tablets 5 and 10 mg  
*Treat for today and tomorrow*

# Additional Selected Safety Information

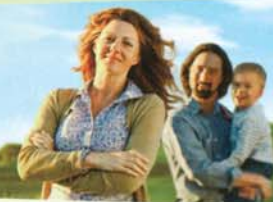

## Neuroleptic Malignant Syndrome (NMS)

- NMS, a potentially fatal symptom complex, has been reported with administration of antipsychotic drugs, including SAPHRIS®
- NMS can cause hyperpyrexia, muscle rigidity, altered mental status, irregular pulse or blood pressure, tachycardia, diaphoresis, and cardiac dysrhythmia. Additional signs may include elevated creatine phosphokinase, myoglobinuria (rhabdomyolysis), and acute renal failure
- Management should include immediate discontinuation of antipsychotic drugs and other drugs not essential to concurrent therapy, intensive symptomatic treatment and medical monitoring, and treatment of any concomitant serious medical problems

## Tardive Dyskinesia (TD)

- The risk of developing TD and the potential for it to become irreversible may increase as the duration of treatment and the total cumulative dose increase
- However, the syndrome can develop, although much less commonly, after relatively brief treatment periods at low doses. Prescribing should be consistent with the need to minimize TD
- If signs and symptoms appear, discontinuation should be considered

## Hyperglycemia and Diabetes Mellitus

- Hyperglycemia, in some cases associated with ketoacidosis, hyperosmolar coma, or death, has been reported in patients treated with atypical antipsychotics
- Patients with risk factors for diabetes mellitus who are starting treatment with atypical antipsychotics should undergo fasting blood glucose testing at the beginning of and during treatment
- Any patient treated with atypical antipsychotics should be monitored for symptoms of hyperglycemia including polydipsia, polyuria, polyphagia, and weakness
- Patients who develop symptoms of hyperglycemia during treatment with atypical antipsychotics should also undergo fasting blood glucose testing
- In some cases, hyperglycemia has resolved when the atypical antipsychotic was discontinued; however, some patients required continuation of antidiabetic treatment despite discontinuation of the antipsychotic drug

## Weight Gain

- There were differences in mean weight gain between SAPHRIS®-treated and placebo-treated patients in short-term schizophrenia trials (1.1 kg vs 0.1 kg) and in bipolar mania trials (1.3 kg vs 0.2 kg). In a 52-week study, the proportion of patients with a  $\geq 7\%$  increase in body weight was 14.7%

## Orthostatic Hypotension, Syncope, and Other Hemodynamic Effects

- SAPHRIS® may induce orthostatic hypotension and syncope
- SAPHRIS® should be used with caution in patients with known cardiovascular disease, cerebrovascular disease, conditions which would predispose them to hypotension, and in the elderly
- SAPHRIS® should be used cautiously when treating patients who receive treatment with other drugs that can induce hypotension, bradycardia, respiratory or central nervous system depression
- Monitoring of orthostatic vital signs should be considered in all such patients, and a dose reduction should be considered if hypotension occurs

## Leukopenia, Neutropenia, and Agranulocytosis

- In clinical trial and postmarketing experience, events of leukopenia/neutropenia have been reported temporally related to antipsychotic agents, including SAPHRIS®
- Patients with a preexisting low white blood cell count (WBC) or a history of leukopenia/neutropenia should have their complete blood count (CBC) monitored frequently during the first few months of therapy, and SAPHRIS® should be discontinued at the first sign of a decline in WBC in the absence of other causative factors

## QT Prolongation

- SAPHRIS® was associated with increases in QTc interval ranging from 2 to 5 msec compared to placebo
- No patients treated with SAPHRIS® experienced QTc increases  $\geq 60$  msec from baseline measurements, nor did any experience a QTc of  $\geq 500$  msec
- SAPHRIS® should be avoided in combination with other drugs known to prolong QTc interval, in patients with congenital prolongation of QT interval or a history of cardiac arrhythmias, and in circumstances that may increase the occurrence of torsades de pointes and/or sudden death in association with the use of drugs that prolong the QTc interval

## Hyperprolactinemia

- Like other drugs that antagonize dopamine D<sub>2</sub> receptors, SAPHRIS® can elevate prolactin levels, and the elevation can persist during chronic administration. Galactorrhea, amenorrhea, gynecomastia, and impotence have been reported in patients receiving prolactin-elevating compounds

## Seizures

- SAPHRIS® should be used cautiously in patients with a history of seizures or with conditions that lower seizure threshold (eg, Alzheimer's dementia)

## Dysphagia

- Esophageal dysmotility and aspiration have been associated with antipsychotic drug use. Aspiration pneumonia is a common cause of morbidity and mortality in elderly patients, in particular those with advanced Alzheimer's dementia
- SAPHRIS® is not indicated for the treatment of dementia-related psychosis, and should not be used in patients at risk for aspiration pneumonia

## Potential for Cognitive and Motor Impairment

- Somnolence was reported in patients treated with SAPHRIS®
- Patients should be cautioned about performing activities requiring mental alertness, such as operating hazardous machinery or operating a motor vehicle, until they are reasonably certain that SAPHRIS® therapy does not affect them adversely

## Body Temperature Regulation

- Appropriate care is advised when prescribing SAPHRIS® for patients who will be experiencing conditions that may contribute to an elevation in core body temperature, eg, exercising strenuously, exposure to extreme heat, receiving concomitant medication with anticholinergic activity, or being subject to dehydration

## Suicide

- The possibility of suicide attempt is inherent in psychotic illnesses and bipolar disorder. Close supervision of high-risk patients should accompany drug therapy
- Prescriptions for SAPHRIS® should be written for the smallest quantity of tablets in order to reduce the risk of overdose

## Hepatic Impairment

- SAPHRIS® is not recommended in patients with severe hepatic impairment

## Drug Interactions

- The risks of using SAPHRIS® in combination with other drugs have not been extensively evaluated. Given the primary CNS effects of SAPHRIS®, caution should be used when it is taken in combination with other centrally acting drugs or alcohol
- Coadministration of SAPHRIS® with strong CYP1A2 inhibitors (fluvoxamine) or compounds which are both CYP2D6 substrates and inhibitors (paroxetine) should be done with caution

## Commonly Observed Adverse Reactions ( $\geq 5\%$ and at least twice that for placebo)

- In short-term bipolar mania trials with SAPHRIS® 5 or 10 mg BID vs placebo:
  - Somnolence (24% vs 6%), dizziness (11% vs 3%), extrapyramidal symptoms other than akathisia (7% vs 2%), and weight increased (5% vs <1%)
- In short-term schizophrenia trials with SAPHRIS® 5 or 10 mg BID vs placebo:
  - Akathisia (6% vs 3%), oral hypoesthesia (numbing of the tongue [5% vs 1%]), and somnolence (13% vs 7%)

Please see accompanying brief summary of full Prescribing Information, including **BOXED WARNING**.

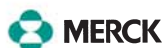

Copyright © 2010 N.V. Organon, a subsidiary of Merck & Co., Inc. All rights reserved.

**Saphris®** (asenapine)  
sublingual tablets 5 and 10 mg  
**Treat for today and tomorrow**



# SAPHRIS®

## (asenapine) sublingual tablets

BRIEF SUMMARY (For full Prescribing Information, see package insert.)

### WARNING: INCREASED MORTALITY IN ELDERLY PATIENTS WITH DEMENTIA-RELATED PSYCHOSIS

Elderly patients with dementia-related psychosis treated with antipsychotic drugs are at an increased risk of death. Analyses of 17 placebo-controlled trials (modal duration of 10 weeks), largely in patients taking atypical antipsychotic drugs, revealed a risk of death in the drug-treated patients of between 1.6 to 1.7 times that seen in placebo-treated patients. Over the course of a typical 10-week controlled trial, the rate of death in drug-treated patients was about 4.5%, compared to a rate of about 2.6% in the placebo group. Although the causes of death were varied, most of the deaths appeared to be either cardiovascular (e.g., heart failure, sudden death) or infectious (e.g., pneumonia) in nature. Observational studies suggest that, similar to atypical antipsychotic drugs, treatment with conventional antipsychotic drugs may increase mortality. The extent to which the findings of increased mortality in observational studies may be attributed to the antipsychotic drug as opposed to some characteristic(s) of the patients is not clear. SAPHRIS® (asenapine) is not approved for the treatment of patients with dementia-related psychosis [see Warnings and Precautions (5.1)].

## 1 INDICATIONS AND USAGE

### 1.1 Schizophrenia

SAPHRIS is indicated for the acute treatment of schizophrenia in adults [see Clinical Studies (14.1)]. The physician who elects to use SAPHRIS for extended periods in schizophrenia should periodically re-evaluate the long-term risks and benefits of the drug for the individual patient [see Dosage and Administration (2.1)].

### 1.2 Bipolar Disorder

SAPHRIS is indicated for the acute treatment of manic or mixed episodes associated with bipolar disorder with or without psychotic features in adults [see Clinical Studies (14.2)]. If SAPHRIS is used for extended periods in bipolar disorder, the physician should periodically re-evaluate the long-term risks and benefits of the drug for the individual patient [see Dosage and Administration (2.2)].

## 4 CONTRAINDICATIONS

None

## 5 WARNINGS AND PRECAUTIONS

### 5.1 Increased Mortality in Elderly Patients with Dementia-Related Psychosis

Elderly patients with dementia-related psychosis treated with antipsychotic drugs are at an increased risk of death. SAPHRIS is not approved for the treatment of patients with dementia-related psychosis [see Boxed Warning].

### 5.2 Cerebrovascular Adverse Events, Including Stroke, in Elderly Patients with Dementia-Related Psychosis

In placebo-controlled trials with risperidone, aripiprazole, and olanzapine in elderly subjects with dementia, there was a higher incidence of cerebrovascular adverse reactions (cerebrovascular accidents and transient ischemic attacks) including fatalities compared to placebo-treated subjects. SAPHRIS is not approved for the treatment of patients with dementia-related psychosis [see also Boxed Warning and Warnings and Precautions (5.1)].

### 5.3 Neuroleptic Malignant Syndrome

A potentially fatal symptom complex sometimes referred to as Neuroleptic Malignant Syndrome (NMS) has been reported in association with administration of antipsychotic drugs, including SAPHRIS. Clinical manifestations of NMS are hyperpyrexia, muscle rigidity, altered mental status, and evidence of autonomic instability (irregular pulse or blood pressure, tachycardia, diaphoresis, and cardiac dysrhythmia). Additional signs may include elevated creatine phosphokinase, myoglobinuria (rhabdomyolysis), and acute renal failure.

The diagnostic evaluation of patients with this syndrome is complicated. It is important to exclude cases where the clinical presentation includes both serious medical illness (e.g. pneumonia, systemic infection) and untreated or inadequately treated extrapyramidal signs and symptoms (EPS). Other important considerations in the differential diagnosis include central anticholinergic toxicity, heat stroke, drug fever, and primary central nervous system pathology.

The management of NMS should include: 1) immediate discontinuation of antipsychotic drugs and other drugs not essential to concurrent therapy; 2) intensive symptomatic treatment and medical monitoring; and 3) treatment of any concomitant serious medical problems for which specific treatments are available. There is no general agreement about specific pharmacological treatment regimens for NMS.

If a patient requires antipsychotic drug treatment after recovery from NMS, the potential reinroduction of drug therapy should be carefully considered. The patient should be carefully monitored, since recurrences of NMS have been reported.

### 5.4 Tardive Dyskinesia

A syndrome of potentially irreversible, involuntary, dyskinetic movements can develop in patients treated with antipsychotic drugs. Although the prevalence of the syndrome appears to be highest among the elderly, especially elderly women, it is impossible to rely upon prevalence estimates to predict, at the inception of antipsychotic treatment, which patients are likely to develop the syndrome. Whether antipsychotic drug products differ in their potential to cause Tardive Dyskinesia (TD) is unknown.

The risk of developing TD and the likelihood that it will become irreversible are believed to increase as the duration of treatment and the total cumulative dose of antipsychotic drugs administered to the patient increase. However, the syndrome can develop, although much less commonly, after relatively brief treatment periods at low doses.

There is no known treatment for established cases of TD, although the syndrome may remit, partially or completely, if antipsychotic treatment is withdrawn. Antipsychotic treatment, itself, however, may suppress (or partially suppress) the signs and symptoms of the syndrome and thereby may possibly mask the underlying process. The effect that symptomatic suppression has upon the long-term course of the syndrome is unknown.

Given these considerations, SAPHRIS should be prescribed in a manner that is most likely to minimize the occurrence of TD. Chronic antipsychotic treatment should generally be reserved for patients who suffer from a chronic illness that (1) is known to respond to antipsychotic drugs, and (2) for whom alternative, equally effective, but potentially less harmful treatments are not available or appropriate. In patients who do require chronic treatment, the smallest dose and the shortest duration of treatment producing a satisfactory clinical response should be sought. The need for continued treatment should be reassessed periodically.

If signs and symptoms of TD appear in a patient on SAPHRIS, drug discontinuation should be considered. However, some patients may require treatment with SAPHRIS despite the presence of the syndrome.

### 5.5 Hyperglycemia and Diabetes Mellitus

Hyperglycemia, in some cases extreme and associated with ketoacidosis or hyperosmolar coma or death, has been reported in patients treated with atypical antipsychotics. In clinical trials of SAPHRIS, the occurrence of any adverse reaction related to glucose metabolism was less than 1% in both the SAPHRIS and placebo treatment groups. Assessment of the relationship between atypical antipsychotic use and glucose abnormalities is complicated by the possibility of an increased background risk of diabetes mellitus in patients with schizophrenia and the increasing incidence of diabetes mellitus in the general population. Given these confounders, the relationship between atypical antipsychotic use and hyperglycemia-related adverse reactions is not completely understood. However, epidemiological studies, which did not include SAPHRIS, suggest an increased risk of treatment-emergent hyperglycemia-related adverse reactions in patients treated with the atypical antipsychotics included in these studies.

Patients with an established diagnosis of diabetes mellitus who are started on atypical antipsychotics should be monitored regularly for worsening of glucose control. Patients with risk factors for diabetes mellitus (e.g., obesity, family history of diabetes) who are starting treatment with atypical antipsychotics should undergo fasting blood glucose testing at the beginning of treatment and periodically during treatment. Any patient treated with atypical antipsychotics should be monitored for symptoms of hyperglycemia including polydipsia, polyuria, polyphagia, and weakness. Patients who develop symptoms of hyperglycemia during treatment with atypical antipsychotics should undergo fasting blood glucose testing. In some cases, hyperglycemia has resolved when the atypical antipsychotic was discontinued; however, some patients required continuation of anti-diabetic treatment despite discontinuation of the antipsychotic drug.

### 5.6 Weight Gain

In short-term schizophrenia and bipolar mania trials, there were differences in mean weight gain between SAPHRIS-treated and placebo-treated patients. In short-term, placebo-controlled schizophrenia trials, the mean weight gain was 1.1 kg for SAPHRIS-treated patients compared to 0.1 kg for placebo-treated patients. The proportion of patients with a  $\geq 7\%$  increase in body weight (at Endpoint) was 4.9% for SAPHRIS-treated patients versus 2% for placebo-treated patients. In short-term, placebo-controlled bipolar mania trials, the mean weight gain for SAPHRIS-treated patients was 1.3 kg compared to 0.2 kg for placebo-treated patients. The proportion of patients with a  $\geq 7\%$  increase in body weight (at Endpoint) was 5.8% for SAPHRIS-treated patients versus 0.5% for placebo-treated patients.

In a 52-week, double-blind, comparator-controlled trial of patients with schizophrenia or schizoaffective disorder, the mean weight gain from baseline was 0.9 kg. The proportion of patients with a  $\geq 7\%$  increase in body weight (at Endpoint) was 14.7%. Table 1 provides the mean weight change from baseline and the proportion of patients with a weight gain of  $\geq 7\%$  categorized by Body Mass Index (BMI) at baseline:

TABLE 1: Weight Change Results Categorized by BMI at Baseline: Comparator-Controlled 52-Week Study in Schizophrenia

|                                           | BMI < 23<br>SAPHRIS<br>N=295 | BMI 23 - < 27<br>SAPHRIS<br>N=290 | BMI > 27<br>SAPHRIS<br>N=302 |
|-------------------------------------------|------------------------------|-----------------------------------|------------------------------|
| Mean change from Baseline (kg)            | 1.7                          | 1                                 | 0                            |
| % with $\geq 7\%$ increase in body weight | 22%                          | 13%                               | 9%                           |

### 5.7 Orthostatic Hypotension, Syncope, and Other Hemodynamic Effects

SAPHRIS may induce orthostatic hypotension and syncope in some patients, especially early in treatment, because of its  $\alpha_1$ -adrenergic antagonist activity. In short-term schizophrenia trials, syncope was reported in 0.2% (1/572) of patients treated with therapeutic doses (5 mg or 10 mg twice daily) of SAPHRIS, compared to 0.3% (1/378) of patients treated with placebo. In short-term bipolar mania trials, syncope was reported in 0.3% (1/379) of patients treated with therapeutic doses (5 mg or 10 mg twice daily) of SAPHRIS, compared to 0% (0/203) of patients treated with placebo. During clinical trials with SAPHRIS, including long-term trials without comparison to placebo, syncope was reported in 0.6% (11/1953) of patients treated with SAPHRIS.

Four normal volunteers in clinical pharmacology studies treated with either intravenous, oral, or sublingual SAPHRIS experienced hypotension, bradycardia, and sinus pauses. These spontaneously resolved in 3 cases, but the fourth subject received external cardiac massage. The risk of this sequence of hypotension, bradycardia, and sinus pause might be greater in nonpsychiatric patients compared to psychiatric patients who are possibly more adapted to certain effects of psychotropic drugs.

Patients should be instructed about nonpharmacologic interventions that help to reduce the occurrence of orthostatic hypotension (e.g., sitting on the edge of the bed for several minutes before attempting to stand in the morning and slowly rising from a seated position). SAPHRIS should be used with caution in (1) patients with known cardiovascular disease (history of myocardial infarction or ischemic heart disease, heart failure or conduction abnormalities), cerebrovascular disease, or conditions which would predispose patients to hypotension (dehydration, hypovolemia, and treatment with antihypertensive medications); and (2) in the elderly. SAPHRIS should be used cautiously when treating patients who receive treatment with other drugs that can induce hypotension, bradycardia, respiratory or central nervous system depression [see Drug Interactions (7)]. Monitoring of orthostatic vital signs should be considered in all such patients, and a dose reduction should be considered if hypotension occurs.

### 5.8 Leukopenia, Neutropenia, and Agranulocytosis

In clinical trial and postmarketing experience, events of leukopenia/neutropenia have been reported temporally related to antipsychotic agents, including SAPHRIS. Agranulocytosis (including fatal cases) has been reported with other agents in the class.

Possible risk factors for leukopenia/neutropenia include pre-existing low white blood cell count

(WBC) and history of drug induced leukopenia/neutropenia. Patients with a pre-existing low WBC or a history of drug induced leukopenia/neutropenia should have their complete blood count (CBC) monitored frequently during the first few months of therapy and SAPHRIS should be discontinued at the first sign of decline in WBC in the absence of other causative factors.

Patients with neutropenia should be carefully monitored for fever or other symptoms or signs of infection and treated promptly if such symptoms or signs occur. Patients with severe neutropenia (absolute neutrophil count <1000/mm<sup>3</sup>) should discontinue SAPHRIS and have their WBC followed until recovery.

### 5.9 QT Prolongation

The effects of SAPHRIS on the QT/QTc interval were evaluated in a dedicated QT study. This trial involved SAPHRIS doses of 5 mg, 10 mg, 15 mg, and 20 mg twice daily, and placebo, and was conducted in 151 clinically stable patients with schizophrenia, with electrocardiographic assessments throughout the dosing interval at baseline and steady state. At these doses, SAPHRIS was associated with increases in QTc interval ranging from 2 to 5 msec compared to placebo. No patients treated with SAPHRIS experienced QTc increases ≥60 msec from baseline measurements, nor did any patient experience a QTc of ≥500 msec.

Electrocardiogram (ECG) measurements were taken at various time points during the SAPHRIS clinical trial program (5 mg or 10 mg twice daily doses). Post-baseline QT prolongations exceeding 500 msec were reported at comparable rates for SAPHRIS and placebo in these short-term trials. There were no reports of Torsade de Pointes or any other adverse reactions associated with delayed ventricular repolarization.

The use of SAPHRIS should be avoided in combination with other drugs known to prolong QTc including Class 1A antiarrhythmics (e.g., quinidine, procainamide) or Class 3 antiarrhythmics (e.g., amiodarone, sotalol), antipsychotic medications (e.g., ziprasidone, chlorpromazine, thioridazine), and antibiotics (e.g., gatifloxacin, moxifloxacin). SAPHRIS should also be avoided in patients with a history of cardiac arrhythmias and in other circumstances that may increase the risk of the occurrence of torsade de pointes and/or sudden death in association with the use of drugs that prolong the QTc interval, including bradycardia; hypokalemia or hypomagnesemia; and presence of congenital prolongation of the QT interval.

### 5.10 Hyperprolactinemia

Like other drugs that antagonize dopamine D<sub>2</sub> receptors, SAPHRIS can elevate prolactin levels, and the elevation can persist during chronic administration. Hyperprolactinemia may suppress hypothalamic GnRH, resulting in reduced pituitary gonadotropin secretion. This, in turn, may inhibit reproductive function by impairing gonadal steroidogenesis in both female and male patients. Galactorrhea, amenorrhea, gynecomastia, and impotence have been reported in patients receiving prolactin-elevating compounds. Long-standing hyperprolactinemia when associated with hypogonadism may lead to decreased bone density in both female and male subjects. In SAPHRIS clinical trials, the incidences of adverse events related to abnormal prolactin levels were 0.4% versus 0% for placebo [see Adverse Reactions (6.2)].

Tissue culture experiments indicate that approximately one-third of human breast cancers are prolactin-dependent *in vitro*, a factor of potential importance if the prescription of these drugs is considered in a patient with previously-detected breast cancer. Neither clinical studies nor epidemiologic studies conducted to date have shown an association between chronic administration of this class of drugs and tumorigenesis in humans, but the available evidence is too limited to be conclusive.

### 5.11 Seizures

Seizures were reported in 0% and 0.3% (0/572, 1/379) of patients treated with doses of 5 mg and 10 mg twice daily of SAPHRIS, respectively, compared to 0% (0/503, 0/203) of patients treated with placebo in short-term schizophrenia and bipolar mania trials, respectively. During clinical trials with SAPHRIS, including long-term trials without comparison to placebo, seizures were reported in 0.3% (5/1953) of patients treated with SAPHRIS. As with other antipsychotic drugs, SAPHRIS should be used with caution in patients with a history of seizures or with conditions that potentially lower the seizure threshold, e.g., Alzheimer's dementia. Conditions that lower the seizure threshold may be more prevalent in patients 65 years or older.

### 5.12 Potential for Cognitive and Motor Impairment

Somnolence was reported in patients treated with SAPHRIS. It was usually transient with the highest incidence reported during the first week of treatment. In short-term, fixed-dose, placebo-controlled schizophrenia trials, somnolence was reported in 15% (41/274) of patients on SAPHRIS 5 mg twice daily and in 13% (26/208) of patients on SAPHRIS 10 mg twice daily compared to 7% (26/378) of placebo patients. In short-term, placebo-controlled bipolar mania trials of therapeutic doses (5-10 mg twice daily), somnolence was reported in 24% (90/379) of patients on SAPHRIS compared to 6% (13/203) of placebo patients. During clinical trials with SAPHRIS, including long-term trials without comparison to placebo, somnolence was reported in 18% (358/1953) of patients treated with SAPHRIS. Somnolence (including sedation) led to discontinuation in 0.6% (12/1953) of patients in short-term, placebo-controlled trials.

Patients should be cautioned about performing activities requiring mental alertness, such as operating hazardous machinery or operating a motor vehicle, until they are reasonably certain that SAPHRIS therapy does not affect them adversely.

### 5.13 Body Temperature Regulation

Disruption of the body's ability to reduce core body temperature has been attributed to antipsychotic agents. In the short-term placebo-controlled trials for both schizophrenia and acute bipolar disorder, the incidence of adverse reactions suggestive of body temperature increases was low (<1%) and comparable to placebo. During clinical trials with SAPHRIS, including long-term trials without comparison to placebo, the incidence of adverse reactions suggestive of body temperature increases (pyrexia and feeling hot) was ≤1%. Appropriate care is advised when prescribing SAPHRIS for patients who will be experiencing conditions that may contribute to an elevation in core body temperature, e.g., exercising strenuously, exposure to extreme heat, receiving concomitant medication with anticholinergic activity, or being subject to dehydration.

### 5.14 Suicide

The possibility of a suicide attempt is inherent in psychotic illnesses and bipolar disorder, and close supervision of high-risk patients should accompany drug therapy. Prescriptions for SAPHRIS should be written for the smallest quantity of tablets consistent with good patient management in order to reduce the risk of overdose.

### 5.15 Dysphagia

Esophageal dysmotility and aspiration have been associated with antipsychotic drug use. Dysphagia was reported in 0.2% and 0% (1/572, 0/379) of patients treated with therapeutic doses (5-10 mg twice daily) of SAPHRIS as compared to 0% (0/378, 0/203) of patients treated with placebo

in short-term schizophrenia and bipolar mania trials, respectively. During clinical trials with SAPHRIS, including long-term trials without comparison to placebo, dysphagia was reported in 0.1% (2/1953) of patients treated with SAPHRIS.

Aspiration pneumonia is a common cause of morbidity and mortality in elderly patients, in particular those with advanced Alzheimer's dementia. SAPHRIS is not indicated for the treatment of dementia-related psychosis, and should not be used in patients at risk for aspiration pneumonia [see also Warnings and Precautions (5.1)].

### 5.16 Use in Patients with Concomitant Illness

Clinical experience with SAPHRIS in patients with certain concomitant systemic illnesses is limited [see Clinical Pharmacology (12.3)].

SAPHRIS has not been evaluated in patients with a recent history of myocardial infarction or unstable heart disease. Patients with these diagnoses were excluded from premarketing clinical trials. Because of the risk of orthostatic hypotension with SAPHRIS, caution should be observed in cardiac patients [see Warnings and Precautions (5.6)].

## 6 ADVERSE REACTIONS

The most common adverse reactions (≥5% and at least twice the rate on placebo) in schizophrenia were akathisia, oral hypoesthesia, and somnolence.

The most common adverse reactions (≥5% and at least twice the rate on placebo) in bipolar disorder were somnolence, dizziness, extrapyramidal symptoms other than akathisia, and weight increased.

The information below is derived from a clinical trial database for SAPHRIS consisting of over 3350 patients and/or normal subjects exposed to one or more sublingual doses of SAPHRIS. Of these subjects, 1953 (1480 in schizophrenia and 473 in acute bipolar mania) were patients who participated in multiple-dose effectiveness trials of therapeutic doses (5 or 10 mg twice daily, with a total experience of approximately 611 patient-years). A total of 486 SAPHRIS-treated patients were treated for at least 24 weeks and 293 SAPHRIS-treated patients had at least 52 weeks of exposure.

The stated frequencies of adverse reactions represent the proportion of individuals who experienced a treatment-emergent adverse event of the type listed. A reaction was considered treatment emergent if it occurred for the first time or worsened while receiving therapy following baseline evaluation. The figures in the tables and tabulations cannot be used to predict the incidence of side effects in the course of usual medical practice where patient characteristics and other factors differ from those that prevailed in the clinical trials. Similarly, the cited frequencies cannot be compared with figures obtained from other clinical investigations involving different treatment, uses, and investigators. The cited figures, however, do provide the prescriber with some basis for estimating the relative contribution of drug and nondrug factors to the adverse reaction incidence in the population studied.

### 6.2 Clinical Studies Experience

**Adult Patients with Schizophrenia:** The following findings are based on the short-term placebo-controlled premarketing trials for schizophrenia (a pool of three 6-week fixed-dose trials and one 6-week flexible-dose trial) in which sublingual SAPHRIS was administered in doses ranging from 5 to 10 mg twice daily.

**Adverse Reactions Associated with Discontinuation of Treatment:** A total of 9% of SAPHRIS-treated subjects and 10% of placebo subjects discontinued due to adverse reactions. There were no drug-related adverse reactions associated with discontinuation in subjects treated with SAPHRIS at the rate of at least 1% and at least twice the placebo rate.

**Adverse Reactions Occurring at an Incidence of 2% or More in SAPHRIS-Treated Schizophrenic Patients:** Adverse reactions associated with the use of SAPHRIS (incidence of 2% or greater, rounded to the nearest percent, and SAPHRIS incidence greater than placebo) that occurred during acute therapy (up to 6-weeks in patients with schizophrenia) are shown in Table 2.

TABLE 2: Adverse Reactions Reported in 2% or More of Subjects in one of the SAPHRIS Dose Groups and Which Occurred at Greater Incidence Than in the Placebo group in 6-Week Schizophrenia Trials

| System Organ Class / Preferred Term                        | Placebo N=378 | SAPHRIS 5 mg twice daily N=274 | SAPHRIS 10 mg twice daily N=208 | All SAPHRIS <sup>5</sup> 5 or 10 mg twice daily N=572 |
|------------------------------------------------------------|---------------|--------------------------------|---------------------------------|-------------------------------------------------------|
| <b>Gastrointestinal disorders</b>                          |               |                                |                                 |                                                       |
| Constipation                                               | 6%            | 7%                             | 4%                              | 5%                                                    |
| Dry mouth                                                  | 1%            | 3%                             | 1%                              | 2%                                                    |
| Oral hypoesthesia                                          | 1%            | 6%                             | 7%                              | 5%                                                    |
| Salivary hypersecretion                                    | 0%            | <1%                            | 4%                              | 2%                                                    |
| Stomach discomfort                                         | 1%            | <1%                            | 3%                              | 2%                                                    |
| Vomiting                                                   | 5%            | 4%                             | 7%                              | 5%                                                    |
| <b>General disorders</b>                                   |               |                                |                                 |                                                       |
| Fatigue                                                    | 3%            | 4%                             | 3%                              | 3%                                                    |
| Irritability                                               | <1%           | 2%                             | 1%                              | 2%                                                    |
| <b>Investigations</b>                                      |               |                                |                                 |                                                       |
| Weight increased                                           | <1%           | 2%                             | 2%                              | 3%                                                    |
| <b>Metabolism disorders</b>                                |               |                                |                                 |                                                       |
| Increased appetite                                         | <1%           | 3%                             | 0%                              | 2%                                                    |
| <b>Nervous system disorders</b>                            |               |                                |                                 |                                                       |
| Akathisia*                                                 | 3%            | 4%                             | 11%                             | 6%                                                    |
| Dizziness                                                  | 4%            | 7%                             | 3%                              | 5%                                                    |
| Extrapyramidal symptoms (excluding akathisia) <sup>†</sup> | 7%            | 9%                             | 12%                             | 10%                                                   |
| Somnolence <sup>‡</sup>                                    | 7%            | 15%                            | 13%                             | 13%                                                   |
| <b>Psychiatric disorders</b>                               |               |                                |                                 |                                                       |
| Insomnia                                                   | 13%           | 16%                            | 15%                             | 15%                                                   |
| <b>Vascular disorders</b>                                  |               |                                |                                 |                                                       |
| Hypertension                                               | 2%            | 2%                             | 3%                              | 2%                                                    |

\* Akathisia includes: akathisia and hyperkinesia.

<sup>†</sup> Extrapyramidal symptoms included dystonia, oculogyration, dyskinesia, tardive dyskinesia, muscle rigidity, parkinsonism, tremor, and extrapyramidal disorder (excluding akathisia).

<sup>‡</sup> Somnolence includes the following events: somnolence, sedation, and hypersomnia.

<sup>§</sup> Also includes the Flexible-dose trial (N=90).

**Dose-Related Adverse Reactions:** Of all the adverse reactions listed in Table 2, the only apparent dose-related adverse reaction was akathisia.

**Adult Patients with Bipolar Mania:** The following findings are based on the short-term placebo-controlled trials for bipolar mania (a pool of two 3-week flexible-dose trials) in which sublingual SAPHRIS was administered in doses of 5 mg or 10 mg twice daily.

**Adverse Reactions Associated with Discontinuation of Treatment:** Approximately 10% (38/379) of SAPHRIS-treated patients in short-term, placebo-controlled trials discontinued treatment due to an adverse reaction, compared with about 6% (12/203) on placebo. The most common adverse reactions associated with discontinuation in subjects treated with SAPHRIS (rates at least 1% and at least twice the placebo rate) were anxiety (1.1%) and oral hypoesthesia (1.1%) compared to placebo (0%).

**Adverse Reactions Occurring at an Incidence of 2% or More Among SAPHRIS-Treated Bipolar Patients:** Adverse reactions associated with the use of SAPHRIS (incidence of 2% or greater, rounded to the nearest percent, and SAPHRIS incidence greater than placebo) that occurred during acute therapy (up to 3-weeks in patients with bipolar mania) are shown in Table 3.

**TABLE 3: Adverse Reactions Reported in 2% or More of Subjects in one of the SAPHRIS Dose Groups and Which Occurred at Greater Incidence Than in the Placebo Group in 3-Week Bipolar Mania Trials**

| System Organ Class / Preferred Term                              | Placebo N=203 | SAPHRIS 5 or 10 mg twice daily* N=379 |
|------------------------------------------------------------------|---------------|---------------------------------------|
| <b>Gastrointestinal disorders</b>                                |               |                                       |
| Dry mouth                                                        | 1%            | 3%                                    |
| Dyspepsia                                                        | 2%            | 4%                                    |
| Oral hypoesthesia                                                | <1%           | 4%                                    |
| Toothache                                                        | 2%            | 3%                                    |
| <b>General disorders</b>                                         |               |                                       |
| Fatigue                                                          | 2%            | 4%                                    |
| <b>Investigations</b>                                            |               |                                       |
| Weight increased                                                 | <1%           | 5%                                    |
| <b>Metabolism disorders</b>                                      |               |                                       |
| Increased appetite                                               | 1%            | 4%                                    |
| <b>Musculoskeletal and connective tissue disorders</b>           |               |                                       |
| Arthralgia                                                       | 1%            | 3%                                    |
| Pain in extremity                                                | <1%           | 2%                                    |
| <b>Nervous system disorders</b>                                  |               |                                       |
| Akathisia                                                        | 2%            | 4%                                    |
| Dizziness                                                        | 3%            | 11%                                   |
| Dysgeusia                                                        | <1%           | 3%                                    |
| Headache                                                         | 11%           | 12%                                   |
| Other extrapyramidal symptoms (excluding akathisia) <sup>†</sup> | 2%            | 7%                                    |
| Somnolence <sup>‡</sup>                                          | 6%            | 24%                                   |
| <b>Psychiatric disorders</b>                                     |               |                                       |
| Anxiety                                                          | 2%            | 4%                                    |
| Depression                                                       | 1%            | 2%                                    |
| Insomnia                                                         | 5%            | 6%                                    |

\* SAPHRIS 5 to 10 mg twice daily with flexible dosing.

<sup>†</sup> Extrapyramidal symptoms included: dystonia, blepharospasm, torticollis, dyskinesia, tardive dyskinesia, muscle rigidity, parkinsonism, gait disturbance, masked facies, and tremor (excluding akathisia).

<sup>‡</sup> Somnolence includes the following events: somnolence, sedation, and hypersomnia.

**Dystonia: Antipsychotic Class Effect:** Symptoms of dystonia, prolonged abnormal contractions of muscle groups, may occur in susceptible individuals during the first few days of treatment. Dystonic symptoms include: spasm of the neck muscles, sometimes progressing to tightness of the throat, swallowing difficulty, difficulty breathing, and/or protrusion of the tongue. While these symptoms can occur at low doses, they occur more frequently and with greater severity with high potency and at higher doses of first generation antipsychotic drugs. An elevated risk of acute dystonia is observed in males and younger age groups.

**Extrapyramidal Symptoms:** In the short-term, placebo-controlled schizophrenia and bipolar mania trials, data was objectively collected on the Simpson Angus Rating Scale for extrapyramidal symptoms (EPS), the Barnes Akathisia Scale (for akathisia) and the Assessments of Involuntary Movement Scales (for dyskinesias). The mean change from baseline for the all-SAPHRIS 5 mg or 10 mg twice daily treated group was comparable to placebo in each of the rating scale scores.

In the short-term, placebo-controlled schizophrenia trials, the incidence of reported EPS-related events, excluding events related to akathisia, for SAPHRIS-treated patients was 10% versus 7% for placebo; and the incidence of akathisia-related events for SAPHRIS-treated patients was 6% versus 3% for placebo. In short-term placebo-controlled bipolar mania trials, the incidence of EPS-related events, excluding events related to akathisia, for SAPHRIS-treated patients was 7% versus 2% for placebo; and the incidence of akathisia-related events for SAPHRIS-treated patients was 4% versus 2% for placebo.

**Laboratory Test Abnormalities: Glucose:** The effects on fasting serum glucose levels in the short-term schizophrenia and bipolar mania trials revealed no clinically relevant mean changes [see also Warnings and Precautions (5.5)]. In the short-term placebo-controlled schizophrenia trials, the mean increase in fasting glucose levels for SAPHRIS-treated patients was 3.2 mg/dL compared to a decrease of 1.6 mg/dL for placebo-treated patients. The proportion of patients with fasting glucose elevations  $\geq 126$  mg/dL (at Endpoint), was 7.4% for SAPHRIS-treated patients versus 6% for placebo-treated patients. In the short-term, placebo-controlled bipolar mania trials, the mean decreases in fasting glucose levels for both SAPHRIS-treated and placebo-treated patients were 0.6 mg/dL. The proportion of patients with fasting glucose elevations  $\geq 126$  mg/dL (at Endpoint), was 4.9% for SAPHRIS-treated patients versus 2.2% for placebo-treated patients.

In a 52-week, double-blind, comparator-controlled trial of patients with schizophrenia and schizoaffective disorder, the mean increase from baseline of fasting glucose was 2.4 mg/dL.

**Lipids:** The effects on total cholesterol and fasting triglycerides in the short-term schizophrenia and bipolar mania trials revealed no clinically relevant mean changes. In short-term,

placebo-controlled schizophrenia trials, the mean increase in total cholesterol levels for SAPHRIS-treated patients was 0.4 mg/dL compared to a decrease of 3.6 mg/dL for placebo-treated patients. The proportion of patients with total cholesterol elevations  $\geq 240$  mg/dL (at Endpoint) was 8.3% for SAPHRIS-treated patients versus 7% for placebo-treated patients. In short-term, placebo-controlled bipolar mania trials, the mean increase in total cholesterol levels for SAPHRIS-treated patients was 1.1 mg/dL compared to a decrease of 1.5 mg/dL in placebo-treated patients. The proportion of patients with total cholesterol elevations  $\geq 240$  mg/dL (at Endpoint) was 8.7% for SAPHRIS-treated patients versus 8.6% for placebo-treated patients. In short-term, placebo-controlled schizophrenia trials, the mean increase in triglyceride levels for SAPHRIS-treated patients was 3.8 mg/dL compared to a decrease of 13.5 mg/dL for placebo-treated patients. The proportion of patients with elevations in triglycerides  $\geq 200$  mg/dL (at Endpoint) was 13.2% for SAPHRIS-treated patients versus 10.5% for placebo-treated patients. In short-term, placebo-controlled bipolar mania trials, the mean decrease in triglyceride levels for SAPHRIS-treated patients was 3.5 mg/dL versus 17.9 mg/dL for placebo-treated subjects. The proportion of patients with elevations in triglycerides  $\geq 200$  mg/dL (at Endpoint) was 15.2% for SAPHRIS-treated patients versus 11.4% for placebo-treated patients.

In a 52-week, double-blind, comparator-controlled trial of patients with schizophrenia and schizoaffective disorder, the mean decrease from baseline of total cholesterol was 6 mg/dL and the mean decrease from baseline of fasting triglycerides was 9.8 mg/dL.

**Transaminases:** Transient elevations in serum transaminases (primarily ALT) in the short-term schizophrenia and bipolar mania trials were more common in treated patients but mean changes were not clinically relevant. In short-term, placebo-controlled schizophrenia trials, the mean increase in transaminase levels for SAPHRIS-treated patients was 1.6 units/L compared to a decrease of 0.4 units/L for placebo-treated patients. The proportion of patients with transaminase elevations  $\geq 3$  times ULN (at Endpoint) was 0.9% for SAPHRIS-treated patients versus 1.3% for placebo-treated patients. In short-term, placebo-controlled bipolar mania trials, the mean increase in transaminase levels for SAPHRIS-treated patients was 8.9 units/L compared to a decrease of 4.9 units/L in placebo-treated patients. The proportion of patients with transaminase elevations  $\geq 3$  times upper limit of normal (ULN) (at Endpoint) was 2.5% for SAPHRIS-treated patients versus 0.6% for placebo-treated patients. No cases of more severe liver injury were seen.

In a 52-week, double-blind, comparator-controlled trial of patients with schizophrenia and schizoaffective disorder, the mean increase from baseline of ALT was 1.7 units/L.

**Prolactin:** The effects on prolactin levels in the short-term schizophrenia and bipolar mania trials revealed no clinically relevant changes in mean change in baseline. In short-term, placebo-controlled schizophrenia trials, the mean decreases in prolactin levels were 6.5 ng/mL for SAPHRIS-treated patients compared to 10.7 ng/mL for placebo-treated patients. The proportion of patients with prolactin elevations  $\geq 4$  times ULN (at Endpoint) were 2.6% for SAPHRIS-treated patients versus 0.6% for placebo-treated patients. In short-term, placebo-controlled bipolar mania trials, the mean increase in prolactin levels was 4.9 ng/mL for SAPHRIS-treated patients compared to a decrease of 0.2 ng/mL for placebo-treated patients. The proportion of patients with prolactin elevations  $\geq 4$  times ULN (at Endpoint) were 2.3% for SAPHRIS-treated patients versus 0.7% for placebo-treated patients.

In a long-term (52-week), double-blind, comparator-controlled trial of patients with schizophrenia and schizoaffective disorder, the mean decrease in prolactin from baseline for SAPHRIS-treated patients was 26.9 ng/mL.

**Other Adverse Reactions Observed During the Premarketing Evaluation of SAPHRIS:** Following is a list of MedDRA terms that reflect adverse reactions reported by patients treated with sublingual SAPHRIS at multiple doses of  $\geq 5$  mg twice daily during any phase of a trial within the database of adult patients. The reactions listed are those that could be of clinical importance, as well as reactions that are plausibly drug-related on pharmacologic or other grounds. Reactions already listed in other parts of Adverse Reactions (6), or those considered in Warnings and Precautions (5) or Overdosage (10) are not included. Although the reactions reported occurred during treatment with SAPHRIS, they were not necessarily caused by it. Reactions are further categorized by MedDRA system organ class and listed in order of decreasing frequency according to the following definitions: those occurring in at least 1/100 patients (only those not already listed in the tabulated results from placebo-controlled trials appear in this listing); those occurring in 1/100 to 1/1000 patients; and those occurring in fewer than 1/1000 patients.

**Blood and lymphatic disorders:**  $<1/1000$  patients: thrombocytopenia;  $\geq 1/1000$  patients and  $<1/100$  patients: anemia

**Cardiac disorders:**  $\geq 1/1000$  patients and  $<1/100$  patients: tachycardia, temporary bundle branch block

**Eye disorders:**  $\geq 1/1000$  patients and  $<1/100$  patients: accommodation disorder

**Gastrointestinal disorders:**  $\geq 1/1000$  patients and  $<1/100$  patients: oral paraesthesia, glossodynia, swollen tongue

**General disorders:**  $<1/1000$  patients: idiosyncratic drug reaction

**Investigations:**  $\geq 1/1000$  patients and  $<1/100$  patients: hyponatremia

**Nervous system disorders:**  $\geq 1/1000$  patients and  $<1/100$  patients: dysarthria

## 7 DRUG INTERACTIONS

The risks of using SAPHRIS in combination with other drugs have not been extensively evaluated. Given the primary CNS effects of SAPHRIS, caution should be used when it is taken in combination with other centrally-acting drugs or alcohol.

Because of its  $\alpha 1$ -adrenergic antagonism with potential for inducing hypotension, SAPHRIS may enhance the effects of certain antihypertensive agents.

### 7.1 Potential for Other Drugs to Affect SAPHRIS

Asenapine is cleared primarily through direct glucuronidation by UGT1A4 and oxidative metabolism by cytochrome P450 isoenzymes (predominantly CYP1A2). The potential effects of inhibitors of several of these enzyme pathways on asenapine clearance were studied.

**TABLE 4: Summary of Effect of Coadministered Drugs on Exposure to Asenapine in Healthy Volunteers**

| Coadministered drug (Postulated effect on CYP450/UGT) | Dose schedules               |                  | Effect on asenapine pharmacokinetics |                    | Recommendation             |
|-------------------------------------------------------|------------------------------|------------------|--------------------------------------|--------------------|----------------------------|
|                                                       | Coadministered drug          | Asenapine        | C <sub>max</sub>                     | AUC <sub>0-∞</sub> |                            |
| Fluvoxamine (CYP1A2 inhibitor)                        | 25 mg twice daily for 8 days | 5 mg Single Dose | +13%                                 | +29%               | Coadminister with caution* |

\*The full therapeutic dose of fluvoxamine would be expected to cause a greater increase in asenapine plasma concentrations. AUC: Area under the curve.

**TABLE 4: Summary of Effect of Coadministered Drugs on Exposure to Asenapine in Healthy Volunteers (cont)**

| Coadministered drug<br>(Postulated effect on<br>CYP450/UGT) | Dose schedules                    |                     | Effect on asenapine<br>pharmacokinetics |                    | Recommendation                                                             |
|-------------------------------------------------------------|-----------------------------------|---------------------|-----------------------------------------|--------------------|----------------------------------------------------------------------------|
|                                                             | Coadministered drug               | Asenapine           | C <sub>max</sub>                        | AUC <sub>0-∞</sub> |                                                                            |
| Paroxetine<br>(CYP2D6 inhibitor)                            | 20 mg once daily<br>for 9 days    | 5 mg<br>Single Dose | -13%                                    | -9%                | No SAPHRIS dose<br>adjustment required<br>[see Drug<br>Interactions (7.2)] |
| Imipramine<br>(CYP1A2/2C19/3A4<br>inhibitor)                | 75 mg<br>Single Dose              | 5 mg<br>Single Dose | +17%                                    | +10%               | No SAPHRIS dose<br>adjustment required                                     |
| Cimetidine<br>(CYP3A4/2D6/1A2<br>inhibitor)                 | 800 mg twice daily<br>for 8 days  | 5 mg<br>Single Dose | -13%                                    | +1%                | No SAPHRIS dose<br>adjustment required                                     |
| Carbamazepine<br>(CYP3A4 inducer)                           | 400 mg twice daily<br>for 15 days | 5 mg<br>Single Dose | -16%                                    | -16%               | No SAPHRIS dose<br>adjustment required                                     |
| Valproate<br>(UGT1A4 inhibitor)                             | 500 mg twice daily<br>for 9 days  | 5 mg<br>Single Dose | 2%                                      | -1%                | No SAPHRIS dose<br>adjustment required                                     |

\*The full therapeutic dose of fluvoxamine would be expected to cause a greater increase in asenapine plasma concentrations. AUC: Area under the curve.

## 7.2 Potential for SAPHRIS to Affect Other Drugs

**Coadministration with CYP2D6 Substrates:** *In vitro* studies indicate that asenapine weakly inhibits CYP2D6.

Following coadministration of dextromethorphan and SAPHRIS in healthy subjects, the ratio of dextromethorphan/dextromethorphan (DX/DM) as a marker of CYP2D6 activity was measured. Indicative of CYP2D6 inhibition, treatment with SAPHRIS 5 mg twice daily decreased the DX/DM ratio to 0.43. In the same study, treatment with paroxetine 20 mg daily decreased the DX/DM ratio to 0.032. In a separate study, coadministration of a single 75-mg dose of imipramine with a single 5-mg dose of SAPHRIS did not affect the plasma concentrations of the metabolite desipramine (a CYP2D6 substrate). Thus, *in vivo*, SAPHRIS appears to be at most a weak inhibitor of CYP2D6. Coadministration of a single 20-mg dose of paroxetine (a CYP2D6 substrate and inhibitor) during treatment with 5 mg SAPHRIS twice daily in 15 healthy male subjects resulted in an almost 2-fold increase in paroxetine exposure. Asenapine may enhance the inhibitory effects of paroxetine on its own metabolism.

SAPHRIS should be coadministered cautiously with drugs that are both substrates and inhibitors for CYP2D6.

## 8 USE IN SPECIFIC POPULATIONS

### 8.1 Pregnancy

**Pregnancy Category C:** There are no adequate and well-controlled studies of SAPHRIS in pregnant women. In animal studies, asenapine increased post-implantation loss and decreased pup weight and survival at doses similar to or less than recommended clinical doses. In these studies there was no increase in the incidence of structural abnormalities caused by asenapine. SAPHRIS should be used during pregnancy only if the potential benefit justifies the potential risk to the fetus.

Asenapine was not teratogenic in reproduction studies in rats and rabbits at intravenous doses up to 1.5 mg/kg in rats and 0.44 mg/kg in rabbits. These doses are 0.7 and 0.4 times, respectively, the maximum recommended human dose (MRHD) of 10 mg twice daily given sublingually on a mg/m<sup>2</sup> basis. Plasma levels of asenapine were measured in the rabbit study, and the area under the curve (AUC) at the highest dose tested was 2 times that in humans receiving the MRHD.

In a study in which rats were treated from day 6 of gestation through day 21 postpartum with intravenous doses of asenapine of 0.3, 0.9, and 1.5 mg/kg/day (0.15, 0.4, and 0.7 times the MRHD of 10 mg twice daily given sublingually on a mg/m<sup>2</sup> basis), increases in post-implantation loss and early pup deaths were seen at all doses, and decreases in subsequent pup survival and weight gain were seen at the two higher doses. A cross-fostering study indicated that the decreases in pup survival were largely due to prenatal drug effects. Increases in post-implantation loss and decreases in pup weight and survival were also seen when pregnant rats were dosed orally with asenapine.

### 8.2 Labor and Delivery

The effect of SAPHRIS on labor and delivery in humans is unknown.

### 8.3 Nursing Mothers

Asenapine is excreted in milk of rats during lactation. It is not known whether asenapine or its metabolites are excreted in human milk. Because many drugs are excreted in human milk, caution should be exercised when SAPHRIS is administered to a nursing woman. It is recommended that women receiving SAPHRIS should not breast feed.

### 8.4 Pediatric Use

Safety and effectiveness in pediatric patients have not been established.

### 8.5 Geriatric Use

Clinical studies of SAPHRIS in the treatment of schizophrenia and bipolar mania did not include sufficient numbers of patients aged 65 and over to determine whether or not they respond differently than younger patients. Of the approximately 2250 patients in premarketing clinical studies of SAPHRIS, 1.1% (25) were 65 years of age or over. Multiple factors that might increase the pharmacodynamic response to SAPHRIS, causing poorer tolerance or orthostasis, could be present in elderly patients, and these patients should be monitored carefully.

Elderly patients with dementia-related psychosis treated with SAPHRIS are at an increased risk of death compared to placebo. SAPHRIS is not approved for the treatment of patients with dementia-related psychosis [see Boxed Warning].

### 8.6 Renal Impairment

The exposure of asenapine following a single dose of 5 mg was similar among subjects with varying degrees of renal impairment and subjects with normal renal function [see Clinical Pharmacology (12.3)].

### 8.7 Hepatic Impairment

In subjects with severe hepatic impairment who were treated with a single dose of SAPHRIS 5 mg, asenapine exposures (on average), were 7-fold higher than the exposures observed in subjects with normal hepatic function. Thus, SAPHRIS is not recommended in patients with severe hepatic impairment (Child-Pugh C) [see Dosage and Administration (2.4) and Clinical Pharmacology (12.3)].

## 10 OVERDOSAGE

**Human Experience:** In premarketing clinical studies involving more than 3350 patients and/or healthy subjects, accidental or intentional acute overdosage of SAPHRIS was identified in 3 patients. Among these few reported cases of overdose, the highest estimated ingestion of SAPHRIS was 400 mg. Reported adverse reactions at the highest dosage included agitation and confusion.

**Management of Overdosage:** There is no specific antidote to SAPHRIS. The possibility of multiple drug involvement should be considered. An electrocardiogram should be obtained and management of overdose should concentrate on supportive therapy, maintaining an adequate airway, oxygenation and ventilation, and management of symptoms.

Hypotension and circulatory collapse should be treated with appropriate measures, such as intravenous fluids and/or sympathomimetic agents (epinephrine and dopamine should not be used, since beta stimulation may worsen hypotension in the setting of SAPHRIS-induced alpha blockade). In case of severe extrapyramidal symptoms, anticholinergic medication should be administered. Close medical supervision and monitoring should continue until the patient recovers.

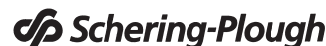

Manufactured by Catalent UK Swindon Zydus Ltd., Blagrove, Swindon, Wiltshire, SN5 8RU, UK.  
Distributed by Schering Corporation, a subsidiary of Schering-Plough Corporation,  
Kenilworth, NJ 07033 USA.  
U.S. Patent No. 5,763,476.

© 2009, Schering Corporation. All rights reserved.  
8/09

33684002T-JBS

Grete Lundbeck European Brain Research Foundation Call for Nominations for

# THE BRAIN PRIZE

THE PRIZE OF € 1 MILLION WILL BE AWARDED FOR THE FIRST TIME IN COPENHAGEN IN MAY 2011

Nominations by 15 September 2010

Nominations will be reviewed by the Selection Committee:

YVES AGID, FRANCE, HUDA AKIL, USA, COLIN BLAKEMORE, UNITED KINGDOM, CHAIRMAN  
FRED. H. GAGE, USA, TOMAS HÖKFELT, SWEDEN, VICE-CHAIRMAN, FLORIAN HOLSBOER, GERMANY  
RANGA R. KRISHNAN, SINGAPORE, JES OLESEN, DENMARK

FOR THE NOMINATION FORM AND DETAILS OF THE NOMINATION PROCEDURE, PLEASE VISIT: [WWW.THEBRAINPRIZE.ORG](http://WWW.THEBRAINPRIZE.ORG)

GRETE LUNDBECK  
EUROPEAN  
BRAIN RESEARCH  
FOUNDATION

THE  
BRAIN  
PRIZE

*The Brain Prize recognizes and rewards outstanding contributions to European neuroscience, from basic to clinical*

**Professional Risk Management Services, Inc. (PRMS) invites you to...**

## LET THE NUMBERS - AND OUR EXPERTS - DO THE TALKING

About The Psychiatrists' Program

*Medical Professional Liability Insurance Designed for Psychiatrists*

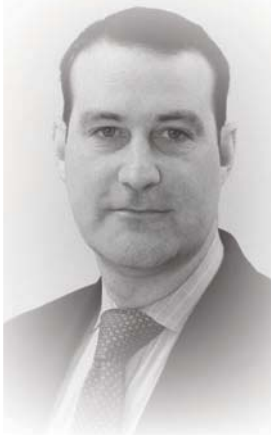

“ In my 11 years at PRMS, I have handled over **2000** events, claims, administrative actions and lawsuits against psychiatrists. You can rest assured that if the unfortunate does occur, your claim will not be outsourced to a large anonymous insurance entity like many other insurance programs. Instead, I will work with you and the defense attorney every step of the way. ”

**Denny Rodriguez, JD**  
**Assistant Vice President, Claims**  
*With PRMS since 1999*

### **Our Claims Numbers Talk...**

- We have handled more than **16,000** psychiatric claims. More than any other company in the world.
- In 2009, **100%** of the cases that were tried to a verdict resulted in a decision in favor of the insured.

## The Psychiatrists' Program

*Medical Professional Liability Insurance  
Designed for Psychiatrists*

Managed by:  
*Professional Risk Management Services, Inc.*  
*for over 25 years.*

(800) 245-3333  
[TheProgram@prms.com](mailto:TheProgram@prms.com)  
[www.psychprogram.com](http://www.psychprogram.com)

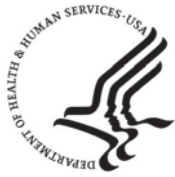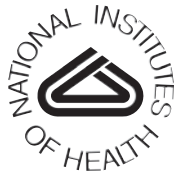

**Supervisory Medical Officer GS-602-15  
Clinical/Medical Branch  
Division of Pharmacotherapies and  
Medical Consequences of Drug Abuse  
National Institute on Drug Abuse  
National Institutes of Health (NIH)  
Department of Health and Human Services**

The National Institute on Drug Abuse (NIDA) at the National Institutes of Health (NIH) is seeking a senior-level medical officer with expertise in medications development and the conduct of clinical trials who will bring significant experience to operate in an intellectually challenging Federal biomedical research institution engaged in a program to develop novel pharmacotherapies to treat drug addictions.

This is a Supervisory, GS-15 level position that offers a unique and challenging opportunity for the right individual to direct an extramural scientific program of national and international scope within the National Institute on Drug Abuse.

Successful candidates must possess an M.D. degree, have knowledge of neuropsychopharmacology and clinical research, and experience in medications development. The candidate should also possess knowledge of addiction medicine and the neuroscience of addiction. Managerial experience in medications development in the biotech or pharmaceutical sectors is highly desirable. The individual must also have demonstrated ability to manage personnel, budgets, and timelines across multiple fiscal years.

Salary is commensurate with experience at the GS-15 level and a full package of Federal benefits is available including retirement, health and life insurance, long term care insurance, leave and savings plan (401 K equivalent). Physicians Comparability Allowance of up to \$30,000 per annum may be paid based on the selected physician's assignment, qualifications, experience, and duration of a negotiated service agreement. In addition, other recruitment incentives may be available as part of this package including annual leave credit for non-federal service; recruitment bonus, and/or an appointment above the minimum.

**Application Process:** This announcement will be open from July 26 through August 23, 2010. For additional information about this opportunity as supervisory Medical Officer at NIDA, please visit [www.usajobs.gov](http://www.usajobs.gov) where detailed information may be found under Announcement HHS/NIH-2010-2594. Supplemental documentation and questions should be submitted to Jean Coleman, Human Resources Specialist, NIH, Office of Human Resources at [Jean.Coleman@nih.gov](mailto:Jean.Coleman@nih.gov), 301-594-1609, or faxed to (301) 451-5688.

*The NIH encourages the application and nomination of qualified women, minorities and individuals with disabilities.*

*HHS and NIH are Equal Opportunity Employers*

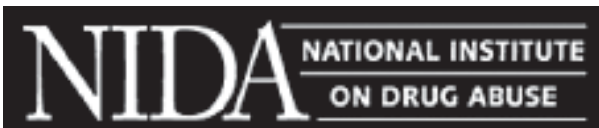

SCENIC CALIFORNIA CENTRAL COAST  
**ATASCADERO STATE HOSPITAL**  
**BE/BC Psychiatrist**

Atascadero State Hospital now pays board certified psychiatrists starting at \$223,464 and advancing stepwise to \$255,732. Atascadero is the nation's premier center for the treatment of forensically committed mentally ill patients. Our hospital is a teaching site affiliated with the University of California, accredited by JCAHO, and recipient of the prestigious Codman Award. All of our psychiatrists are board eligible and most are board certified. Many of our psychiatrists have forensic subspecialty boards.

We are located midway between San Francisco and Los Angeles on the scenic central California Coast, south of Big Sur. We offer a spectacularly beautiful environment in San Luis Obispo County with temperate climate, beaches, world class wineries, cultural activities, golfing, sailing, riding, clean air, and excellent schools through the University level.

Our benefit package is valued at an additional 39%, which includes retirement plans (including safety retirement), health plans, professional liability coverage, paid holidays, educational leave, and generous annual leave. On-call duty is compensated hour for hour over and above the base salary. Applicants must hold a current California license, or have pending application with the Medical Board of California.

For a prompt and confidential review, send CV to:

**Jeanne Garcia, M.D.**

**P. O. Box 7001**

**Atascadero, CA 93423-7001**

**(805) 468-2005 or fax (805) 468-2138**

**or e-mail us: [jeanne.garcia@ash.dmh.ca.gov](mailto:jeanne.garcia@ash.dmh.ca.gov)**

**WE ARE AN EQUAL OPPORTUNITY EMPLOYER.**

**PSYCHIATRIST**

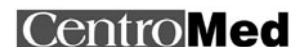

CentroMed is a community healthcare center located in San Antonio, TX. We provide medical, obstetric, dental, and mental health services with a team of 400+ employees. We are currently seeking a full-time adult psychiatrist to treat patients primarily with mood and anxiety disorders in an integrated health care setting.

This position does not have an on-call requirement. We offer psychiatric services, group, and individual counseling on an out-patient basis.

The ideal candidate will have at least two years of adult psychiatry and counseling experience. Bi-lingual skills in Spanish are a definite plus. Must have an unrestricted license in Texas prior to practicing.

We offer a competitive compensation package. This position is eligible for the student loan repayment program through the National Health Service Corps.

Please address questions or forward CV to the following:

**Ernesto Gomez, Ph.D.**

**President & CEO**

**CentroMed**

**3750 Commercial Ave**

**San Antonio, TX 78221**

**Phone: (210) 334-3703**

**Fax: (210) 271-7208**

**[Egomez.cdb@tachc.org](mailto:Egomez.cdb@tachc.org)**

## A culture like no other

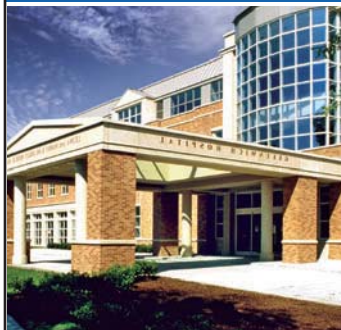

At **Greenwich Hospital**, a 174-bed regional provider of care and affiliate of Yale New Haven Health, you'll find a hospital and a working culture like no other. Conveniently located minutes from I-95, I-684, I-287, the Merritt/Hutchinson Parkway and Westchester County—and close to public transportation and shuttle service—Greenwich Hospital offers a beautiful, state-of-the-art facility that serves as a national model for advanced health care design.

### Psychiatrist

Full-Time

In this role, you will be providing diagnostic assessment and psychiatric treatment to individuals who present themselves to the Outpatient Psychiatric Treatment Center or Hospital Emergency Room with symptoms of mental illness or emotional distress. Must be MD Board Certified in Psychiatry with outpatient experience. Bilingual or experience with a geriatric or adolescent population is a plus.

Greenwich Hospital offers a unique and rewarding environment, along with competitive compensation, generous benefits and extensive opportunities for growth. **Please apply online at [www.greenwichhospitalcareers.com](http://www.greenwichhospitalcareers.com).** EOE.

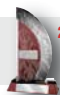

2006, 2007, 2008 & 2009 Winner  
Press Ganey  
Summit Award

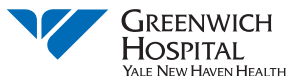

[www.greenwichhospitalcareers.com](http://www.greenwichhospitalcareers.com)

## City-Wide Chair/Chief Department of Psychiatry

The Schulich School of Medicine & Dentistry, The University of Western Ontario (UWO), London Health Sciences Centre (LHSC) and St. Joseph's Health Care London, invite applications/nominations for the position of Chair/Chief of the Department of Psychiatry.

The Department of Psychiatry is one of the larger clinical academic departments at the Schulich School of Medicine & Dentistry. The vision for the Department of Psychiatry is to be a Centre of Excellence for psychiatric care and discovery in South Western Ontario with a mission to translate clinical research into treatment and provide regional consultation within interdisciplinary models of care.

The Department of Psychiatry in the Schulich School of Medicine & Dentistry at Western has established a standard of excellence in its academic endeavours that has grown out of the development of strong divisions with committed leaders. Each division is headed by an academic chair and several have a chair/chief role, mirroring the Chair/Chief role of the Department of Psychiatry head.

There is overlap and collaboration across the divisions, ensuring a strong centralized academic department; the divisions also provide opportunity for individuals with specific interest and expertise to thrive academically. Each academic division has a strong link, through membership, with clinical programs in our affiliated teaching hospitals and research institutions. This provides the academic substrate for teaching and training, research and clinical service. These linkages are fostered by a shared administrative leadership model that replicates, at all levels, the partnership between the Vice-President Mental Health Services and the Chair/Chief/Senior Medical Director for Psychiatry. Our affiliated teaching institutions include London Health Sciences Centre, St. Joseph's Health Care, CPRI and Madame Vanier Children's Centre. Our research affiliations are with Lawson Health Research Institute and the Roberts Research Institute.

The new Chair/Chief must have the vision to expand the strengths of integrated teaching and research programs aligned with the University, Lawson Health Research Institute, London Health Science Center and St Joseph's Health Care. He/she will be a strong leader/administrator and an excellent communicator, able to realize the departmental mission and goals through collaboration and advocacy with its partners and to the community. He/She will work collaboratively with basic and clinical scientists and clinicians. A candidate with a strong track record of teaching, research and clinical service accomplishments is desired. The successful candidate must be an accomplished clinician with an MD or equivalent and eligible for licensure in Ontario. Academic rank and contractual arrangements will commensurate with experience and qualification.

Interested candidates are encouraged to apply by the deadline of **October 15, 2010** with CV, letter of application together, and the names and addresses of three references. The position will remain open until filled.

**Dr. Michael Strong, Dean and  
Dr. Gillian Kernaghan, Integrated Vice President,  
Medical Education & Medical Affairs  
c/o Heather Frankling  
Selection Committee Coordinator  
Schulich School of Medicine & Dentistry, Room 3720  
The University of Western Ontario  
London, Ontario N6A 5C1**

*Positions are subject to budget approval. Applicants should have fluent written and oral communications skills in English. All qualified candidates are encouraged to apply; however, Canadians and permanent residents will be given priority. The University of Western Ontario, London Health Sciences Centre and St. Joseph's Health Care London are committed to employment equity and welcomes applications from all qualified women and men, including visible minorities, aboriginal people and persons with disabilities.*

## ADULT PSYCHIATRY

Logan, Utah

One BC/BE adult psychiatrist is needed to join a partner who is employed by Intermountain Healthcare at Logan Regional Hospital. Position will be 30+ hours per week in an outpatient setting. Physician will also assist in coverage of inpatient services. Salary guarantee with transition to production. Signing bonus available. Full Intermountain benefits including defined pension and match in 401k. Moving allowance provided. EOE. Intermountain is frequently referenced nationally as one of the leaders in delivering high quality/low cost health care.

Logan is a beautiful university community of over 100,000. It is one of the top ten safest communities in which to live. Excellent primary care is available as well as a wide variety of specialty care. Logan fosters a wide variety of cultural, educational, recreational, sporting, commercial and health care opportune-ties. A moderate four seasons and majestic mountains allow for outstanding outdoor recreation opportunities. Along with the academic stimulation of Utah State University, Logan offers superb family living with quality school systems and reasonable living costs generally 10 to 25% less than other areas of the country.

Send/e-mail/fax CV to Intermountain Healthcare, Attn: Wilf Rudert, Physician Recruiting Dept., 36 S. State Street, 21<sup>st</sup> Floor, Salt Lake City, UT 84111.  
800-888-3134. Fax: 801-442-2999.  
PhysicianRecruit@imail.org  
<http://intermountain.net/docjobs>

# The NEW [www.appi.org](http://www.appi.org) just debuted! Visit today!

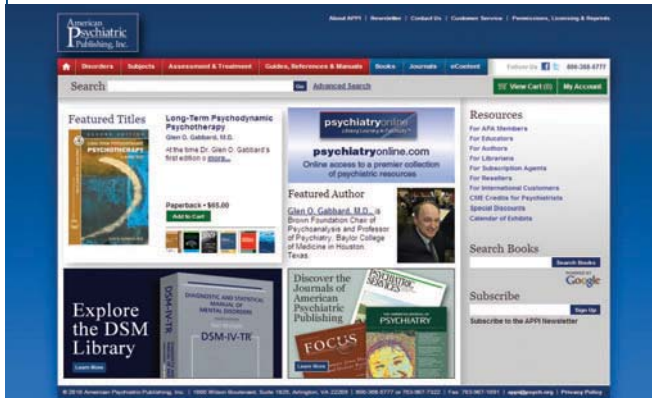

## www.appi.org offers:

- Special Discounts for American Psychiatric Association Members and Members-in-Training
- Detailed descriptions on more than 700 titles + subscription products
- Fast and easy navigation
- Enhanced search engine
- **My Account** history with order and tracking information

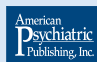

The *First* and *Last* Word in Psychiatry  
American Psychiatric Publishing, Inc.  
1000 Wilson Boulevard, Suite 1825  
Arlington, VA 22209

Priority Code DH1023A

# PSYCHIATRISTS

## AT CENTRAL NEW YORK PSYCHIATRIC CENTER

Central New York Psychiatric Center, a State-operated, JCAHO Accredited Facility, is seeking full time Psychiatrists at its main Inpatient Facility in Marcy, NY, and at its Forensic Outpatient Units throughout New York State, including: Albion, Clinton (Dannemora), Collins Downstate (Fishkill), Great Meadow (Comstock), 5 Points (Romulus), Groveland, Mid-State (Marcy), Sullivan (Fallsburg) and Wende (Alden). Comprehensive NY State Benefits package available. Outstanding NY State Pension Plan. Opportunity for Loan Forgiveness Program. Opportunities exist for additional compensation.

### Assistant Psychiatrist:

**\$107,318-\$119,449 (general salary increases of 4% in 2010 is scheduled).**

**Qualifications:** Possession of a NY State Limited Permit AND completion of a training program in psychiatry approved by the American Board of Psychiatry and Neurology for entrance into their certifying examination AND eligibility for full and unconditional participation in Medicaid and Medicare programs.

### Psychiatrist 1:

**\$168,421.**

**Qualifications:** Possession of a License to practice medicine in NY State OR possession of a Limited Permit and licensure in another state or by written examination in Canada; AND completion of a training program in psychiatry approved by the American Board of Psychiatry and Neurology for entrance into their certifying examination; AND eligibility for full and unconditional participation in Medicaid and Medicare programs.

### Psychiatrist 2:

**\$174,798 (general salary increase 4% in 2010 is scheduled).**

**Qualifications:** Possession of a license to practice medicine in NY State OR possession of a Limited Permit and licensure in another state or by written examination in Canada; AND certified in psychiatry by the American Board of Psychiatry and Neurology; AND eligibility for full and unconditional participation in Medicaid and Medicare programs.

### Direct Contact Information:

**Dr. Jonathan Kaplan,**

**Clinical Director, Central New York Psychiatric Center**

**Box 300 Marcy, NY 13403.**

**Phone: (845) 483-3443, Fax: (845) 483-3455.**

**E-mail: [CN00025@OMH.STATE.NY.US](mailto:CN00025@OMH.STATE.NY.US)**

EOE/AA

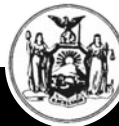

**For more information about Central New York Psychiatric Center, please visit the facility website:**

**<http://www.omh.state.ny.us/omhweb/facilities/cnpe/facility.htm>**

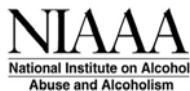

Department of Health and Human Services  
National Institutes of Health  
National Institute on  
Alcohol Abuse and Alcoholism

Director,  
Division of Treatment and Recovery Research  
(DTRR)

The National Institute on Alcohol Abuse and Alcoholism (NIAAA), a major research component of the National Institutes of Health (NIH) and the Department of Health and Human Services (HHS), is recruiting for a senior executive to serve as the Director of the Division of Treatment and Recovery Research (DTRR).

The Director, DTRR, provides national leadership for research on the treatment of alcohol use disorders, including setting scientific priorities through the development of long-term strategic plans and execution of funding decisions. In this capacity, the Director, DTRR leads the Division's efforts on planning, stimulating, developing, and supporting clinical research on cutting-edge therapies for alcoholism. Clinical research at the NIAAA encompasses medications development, behavioral therapies, combined medications and behavioral therapies, recovery research, health services research, and the translation of research into clinical practice. Medications development is one of the NIAAA's top research priorities. The Director, DTRR, oversees the NIAAA's work on the full continuum of research included under medications development—from human laboratory studies to clinical trials, which requires close collaboration with internal and external scientists and researchers with other Federal State and Local government agencies, and national and international research organizations. The Director, DTRR serves as the principal advisor to the Director, NIAAA on alcohol treatment and recovery issues and advises the National Advisory Council on pending grant applications and the status of programs in the federal and private sector.

The selected candidate will be expected to hold a M.D., Ph.D., or equivalent degree. Criteria for selection includes: experience in developing, implementing and/or evaluating behavioral and clinical therapies, specifically in the area of medications development, relevant to alcoholism; experience in managing/leading a complex clinical research organization, experience and expertise in communicating clinical, basic research and programmatic information to scientific and non-scientific audiences; a strong publication record in the field of clinical, behavioral, and medications development research and experience in

developing, implementing and managing multidisciplinary and trans-disciplinary research programs on treatments for alcohol use disorders and determinants of post-treatment recovery.

The Director, DTRR, is an Excepted Service position (Title 42), and the successful candidate will be appointed at a salary commensurate with qualifications and experience. Full Federal benefits including leave, health and life insurance, long-term care insurance, retirement, and savings plan (401K equivalent) will be provided.

Interested candidates should submit a curriculum vitae, bibliography, and the names, addresses, contact numbers (phone and fax) and e-mail address of four references by the closing date to the following e-mail account:

E-mail: [dtrrdirect@mail.nih.gov](mailto:dtrrdirect@mail.nih.gov)

Applications will be accepted through September 15, 2010, or until the position is filled.

The NIH encourages the application and nomination of qualified women, minorities and individuals with disabilities. This position is subject to background investigation. The DHHS and NIH are Equal Opportunity Employers



SEE THE BEST THAT CLEVELAND HAS TO OFFER.

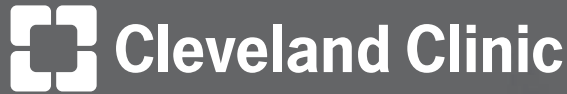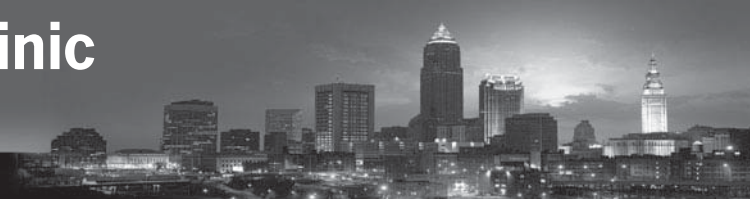

## Psychiatrist | FAMILY HEALTH AND SURGERY CENTER

The Cleveland Clinic is recruiting a board certified/board eligible psychiatrist with experience in long-term care being preferable to join in their expanding geriatric practice within the Cleveland Clinic Lorain Institute. The primary responsibility of this position will be to provide behavioral healthcare consultation within the context of the geriatric group practice in addition, the candidate will work with the director of behavioral health to develop and staff a high-quality nursing home psychiatric practice within the Lorain Institute. Opportunities for outpatient and/or inpatient geriatric psychiatric practice will be available at the discretion of the candidate. At present, the group consists of two experienced geriatricians and five geriatric nurse practitioners. It is expected that this practice will grow over time under the leadership of the selected candidate, who will develop collegial relationships with the medical geriatricians and nurse practitioners. The prospective candidate will need to be able to work within a treatment team format, and will be provided with sufficient support for both administrative and clinical duties.

Candidates who are board certified/board eligible in psychiatry with experience in long-term care consultation are encouraged to apply. There will be no routine on-call expectations for nights or weekends.

**Interested candidates should submit an application online by going to [www.clevelandclinic.org](http://www.clevelandclinic.org) and go to Cleveland Clinic Careers and search under Physician Opportunities.**

Cleveland Clinic is an equal opportunity employer and is committed to increasing the diversity of its faculty. It welcomes nominations of and applications from women and members of minority groups, as well as others who would bring additional dimensions to its research, teaching, and clinical missions. Cleveland Clinic is a smoke/drug-free work environment.

Candidates and Employers  
Connect through the  
APA Job Bank  
[psych.org/jobbank](http://psych.org/jobbank)

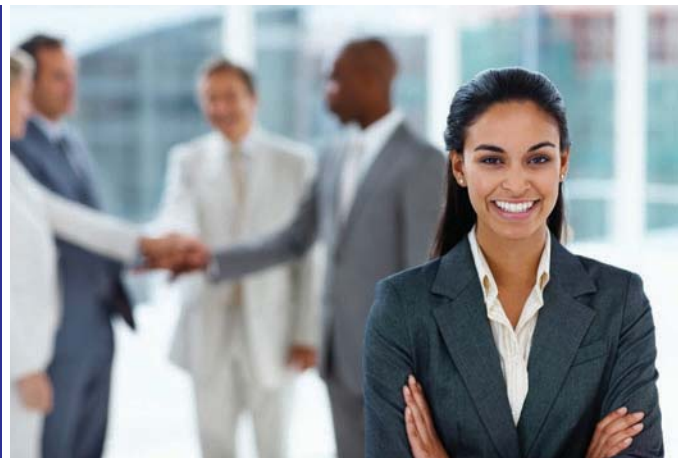

### Candidates

- Search the most comprehensive online listing of psychiatric positions at [psych.org/jobbank](http://psych.org/jobbank).
- Register to post your resume, receive instant job alerts, use the career tools and more.
- Visit the redesigned and enhanced APA Job Bank website to find the ideal position!

### Employers

- Use the many resources of the APA Job Bank to meet qualified candidates and make a smart recruitment decision.
- Advertise in the *Psychiatric News* or *Psychiatric Services* classifieds and the APA Job Bank and receive a 10% discount on each.

For more information, contact Lindsey Fox  
at 703-907-7331 or [classads@psych.org](mailto:classads@psych.org)

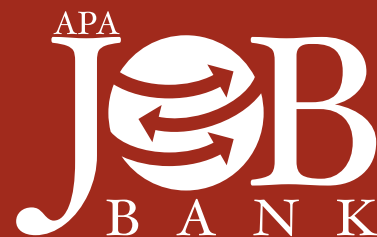

# Index to Advertisers

## August 2010

The publication of an advertisement in this journal does not imply endorsement of the product or service by the American Psychiatric Association.

Employment Opportunities .....A25-A28

Grete Lundbeck European Brain Research  
Foundation .....A23

Labopharm, Inc.  
Oleptro .....A5-A9

Merck  
Saphris ..... 17-22

Professional Risk Management Services, Inc.  
.....A23

U.S. Pharmaceuticals, Pfizer, Inc.  
Geodon .....A30-C4

### Subscription and Business Information

The American Journal of Psychiatry, ISSN 0002-953X, is published monthly by the American Psychiatric Association, 1000 Wilson Blvd., Suite 1825, Arlington, VA 22209-3901. Subscriptions (per year): individual \$230.00, international \$347.00. For additional subscription options, including single issues and student rates, please contact Customer Service at 1-800-368-5777 or email [appi@psych.org](mailto:appi@psych.org). Institutional subscriptions are tier priced. For institutional site license or pricing information, contact 703-907-8538 or email [institutions@psych.org](mailto:institutions@psych.org).

Business communications, address changes, and subscription questions from APA members should be directed to the Division of Member Services: (888) 35-PSYCH (toll-free). Nonmember subscribers should call the Circulation Department (800) 368-5777. Author inquiries should be directed to the Journal editorial office: (703) 907-7885 or (703) 907-7884; fax (703) 907-1096; e-mail [ajp@psych.org](mailto:ajp@psych.org).

Business Management: Nancy Frey, Director, Publishing Services; Laura G. Abedi, Associate Director, Production; Allison Jones, Advertising Prepress Manager; Robert Pursell, Associate Publisher Advertising, Sales and Marketing.

Pharmaceutical Print Advertising: Frank Cox, Kathleen Harrison, Valentin Torres, Pharmaceutical Media, Inc. 30 East 33rd Street, New York, NY 10016. (212) 685-5010; fax (212) 685-6126; e-mail [vtorres@pminy.com](mailto:vtorres@pminy.com).

Nonpharmaceutical and Online Sales: Brian Skepton, (703) 907-7332; e-mail [bskepton@psych.org](mailto:bskepton@psych.org).

Pages are produced using Adobe InDesign CS4. Printed by RR Donnelley, Mendota, IL, on acid-free paper effective with Volume 164, Number 11, November 2007.

Periodicals postage paid at Arlington, VA, and additional mailing offices. POSTMASTER: Send address changes to The American Journal of Psychiatry, Circulation Department, American Psychiatric Association, 1000 Wilson Blvd., Suite 1825, Arlington, VA 22209-3901.

Indexed in Abstracts for Social Workers, Academic Abstracts, Biological Abstracts, Chemical Abstracts, Chicago Psychoanalytic Literature Index, Cumulative Index to Nursing Literature, Excerpta Medica, Hospital Literature Index, Index Medicus, International Nursing Index, Nutrition Abstracts, Psychological Abstracts, Science Citation Index, Social Science Source, and Social Sciences Index.

The American Psychiatric Association does not hold itself responsible for statements made in its publications by contributors or advertisers. Unless so stated, material in The American Journal of Psychiatry does not reflect the endorsement, official attitude, or position of the American Psychiatric Association or of the Journal's Editorial Board.

Authorization to photocopy items for internal or personal use, or the internal or personal use of specific clients, is granted by the American Psychiatric Association for libraries and other users registered with the Copyright Clearance Center (CCC) Transactional Reporting Service, provided that the base fee of \$15.00 per copy is paid directly to CCC, 222 Rosewood Drive, Danvers, MA 01923; (978) 750-8400 (tel), (978) 646-8600 (fax), [www.copyright.com](http://www.copyright.com) (web site). 0002-953X/05/\$15.00.

This consent does not extend to other kinds of copying, such as copying for general distribution, for advertising or promotional purposes, for creating new collective works, or for resale. Requests for commercial distribution should be directed to (703) 907-7894. APA does not require that permission be obtained for the photocopying of isolated articles for nonprofit classroom or library reserve use; all fees associated with such permission are waived.

Copyright © 2010 American Psychiatric Association.

## GEODON® (ziprasidone HCl) Capsules

## GEODON® (ziprasidone mesylate) injection for intramuscular use

**BRIEF SUMMARY:** See package insert for full prescribing information.

**INCREASED MORTALITY IN ELDERLY PATIENTS WITH DEMENTIA-RELATED PSYCHOSIS—Elderly patients with dementia-related psychosis treated with antipsychotic drugs are at an increased risk of death. Analyses of seventeen placebo-controlled trials (modal duration of 10 weeks), largely in patients taking atypical antipsychotic drugs, revealed a risk of death in drug-treated patients of between 1.6 to 1.7 times the risk of death in placebo-treated patients. Over the course of a typical 10-week controlled trial, the rate of death in drug-treated patients was about 4.5%, compared to a rate of about 2.6% in the placebo group. Although the causes of death were varied, most of the deaths appeared to be either cardiovascular (e.g., heart failure, sudden death) or infectious (e.g., pneumonia) in nature. Observational studies suggest that, similar to atypical antipsychotic drugs, treatment with conventional antipsychotic drugs may increase mortality. The extent to which the findings of increased mortality in observational studies may be attributed to the antipsychotic drug as opposed to some characteristic(s) of the patients is not clear. GEODON (ziprasidone) is not approved for the treatment of patients with Dementia-Related Psychosis (see WARNINGS).**

### INDICATIONS

GEODON is indicated for the treatment of schizophrenia, as monotherapy for the acute treatment of bipolar manic or mixed episodes, and as an adjunct to lithium or valproate for the maintenance treatment of bipolar disorder. GEODON intramuscular is indicated for acute agitation in schizophrenic patients.

### DOSAGE AND ADMINISTRATION

**Schizophrenia** GEODON Capsules should be administered at an initial daily dose of 20 mg twice daily with food. In some patients, daily dosage may subsequently be adjusted on the basis of individual clinical status up to 80 mg twice daily. Dosage adjustments, if indicated, should generally occur at intervals of not less than 2 days, as steady-state is achieved within 1 to 3 days. In order to ensure use of the lowest effective dose, patients should ordinarily be observed for improvement for several weeks before upward dosage adjustment. Efficacy in schizophrenia was demonstrated in a dose range of 20 mg to 100 mg twice daily in short-term, placebo-controlled clinical trials. There were trends toward dose response within the range of 20 mg to 80 mg twice daily, but results were not consistent. An increase to a dose greater than 80 mg twice daily is not generally recommended. The safety of doses above 100 mg twice daily has not been systematically evaluated in clinical trials. **Maintenance Treatment**—While there is no body of evidence available to answer the question of how long a patient treated with ziprasidone should remain on it, a maintenance study in patients who had been symptomatically stable and then randomized to continue ziprasidone or switch to placebo demonstrated a delay in time to relapse for patients receiving GEODON. No additional benefit was demonstrated for doses above 20 mg twice daily. Patients should be periodically reassessed to determine the need for maintenance treatment. **Bipolar I Disorder Acute Treatment of Manic or Mixed Episodes**—Dose Selection: Oral ziprasidone should be administered at an initial daily dose of 40 mg twice daily with food. The dose may then be increased to 60 mg or 80 mg twice daily on the second day of treatment and subsequently adjusted on the basis of tolerance and efficacy within the range 40 mg to 80 mg twice daily. In the flexible-dose clinical trials, the mean daily dose administered was approximately 120 mg. **Maintenance Treatment (as an adjunct to lithium or valproate)**—Continue treatment at the same dose on which the patient was initially stabilized, within the range of 40 mg to 80 mg twice daily with food. Patients should be periodically reassessed to determine the need for maintenance treatment. **Acute Treatment of Agitation in Schizophrenia Intramuscular Dosing**—The recommended dose is 10 mg to 20 mg administered as required up to a maximum dose of 40 mg per day. Doses of 10 mg may be administered every two hours; doses of 20 mg may be administered every four hours up to a maximum of 40 mg/day. Intramuscular administration of ziprasidone for more than three consecutive days has not been studied. If long-term therapy is indicated, oral ziprasidone hydrochloride capsules should replace the intramuscular administration as soon

as possible. Since there is no experience regarding the safety of administering ziprasidone intramuscular to schizophrenic patients already taking oral ziprasidone, the practice of co-administration is not recommended. Ziprasidone intramuscular is intended for intramuscular use only and should not be administered intravenously. Intramuscular Preparation for Administration GEODON for Injection (ziprasidone mesylate) should only be administered by intramuscular injection and should not be administered intravenously. Single-dose vials require reconstitution prior to administration. Add 1.2 mL of Sterile Water for Injection to the vial and shake vigorously until all the drug is dissolved. Each mL of reconstituted solution contains 20 mg ziprasidone. To administer a 10 mg dose, draw up 0.5 mL of the reconstituted solution. To administer a 20 mg dose, draw up 1.0 mL of the reconstituted solution. Any unused portion should be discarded. Since no preservative or bacteriostatic agent is present in this product, aseptic technique must be used in preparation of the final solution. This medicinal product must not be mixed with other medicinal products or solvents other than Sterile Water for Injection. Parenteral drug products should be inspected visually for particulate matter and discoloration prior to administration, whenever solution and container permit. **Dosing in Special Populations Oral:** Dosage adjustments are generally not required on the basis of age, gender, race, or renal or hepatic impairment. GEODON is not approved for use in children or adolescents. **Intramuscular:** Ziprasidone intramuscular has not been systematically evaluated in elderly patients or in patients with hepatic or renal impairment. As the cyclodextrin excipient is cleared by renal filtration, ziprasidone intramuscular should be administered with caution to patients with impaired renal function. Dosing adjustments are not required on the basis of gender or race.

### CONTRAINDICATIONS

**QT Prolongation** Because of ziprasidone's dose-related prolongation of the QT interval and the known association of fatal arrhythmias with QT prolongation by some other drugs, ziprasidone is contraindicated in patients with a known history of QT prolongation (including congenital long QT syndrome), with recent acute myocardial infarction, or with uncompensated heart failure (see **WARNINGS**). Pharmacokinetic/pharmacodynamic studies between ziprasidone and other drugs that prolong the QT interval have not been performed. An additive effect of ziprasidone and other drugs that prolong the QT interval cannot be excluded. Therefore, ziprasidone should not be given with dofetilide, sotalol, quinidine, other Class Ia and III anti-arrhythmics, mesoridazine, thioridazine, chlorpromazine, droperidol, pimozide, sparfloxacin, gatifloxacin, moxifloxacin, halofantrine, mefloquine, pentamidine, arsenic trioxide, levomethadyl acetate, dolasetron mesylate, prochlorolol or tacrolimus. Ziprasidone is also contraindicated with other drugs that have demonstrated QT prolongation as one of their pharmacodynamic effects and have this effect described in the full prescribing information as a contraindication or a boxed or bolded warning [see **WARNINGS**]. Ziprasidone is contraindicated in individuals with a known hypersensitivity to the product.

### WARNINGS

**Increased Mortality in Elderly Patients with Dementia-Related Psychosis: Elderly patients with dementia-related psychosis treated with antipsychotic drugs are at an increased risk of death. GEODON is not approved for the treatment of dementia-related psychosis (see BOXED WARNING).**

**QT Prolongation and Risk of Sudden Death** Ziprasidone use should be avoided in combination with other drugs that are known to prolong the QT<sub>c</sub> interval. Additionally, clinicians should be alert to the identification of other drugs that have been consistently observed to prolong the QT<sub>c</sub> interval. Such drugs should not be prescribed with ziprasidone. Ziprasidone should also be avoided in patients with congenital long QT syndrome and in patients with a history of cardiac arrhythmias (see **CONTRAINDICATIONS**).

**QT Prolongation in Clinical Trials** A study directly comparing the QT/QT<sub>c</sub> prolonging effect of oral ziprasidone with several other drugs effective in the treatment of schizophrenia was conducted in patient volunteers. The mean increase in QT<sub>c</sub> from baseline for ziprasidone ranged from approximately 9 to 14 msec greater than for four of the comparator drugs (risperidone, olanzapine, quetiapine, and haloperidol), but was approximately 14 msec less than the prolongation observed for thioridazine. In this study, the effect of ziprasidone on QT<sub>c</sub> length was not augmented by the presence of a metabolic inhibitor (ketoconazole

200 mg twice daily). In placebo-controlled trials, oral ziprasidone increased the QT<sub>c</sub> interval compared to placebo by approximately 10 msec at the highest recommended daily dose of 160 mg. In clinical trials the electrocardiograms of 2/2988 (0.06%) patients who received GEODON and 1/440 (0.23%) patients who received placebo revealed QT<sub>c</sub> intervals exceeding the potentially clinically relevant threshold of 500 msec. In the ziprasidone-treated patients, neither case suggested a role of ziprasidone. **QT Prolongation and Torsade De Pointes** Some drugs that prolong the QT/QT<sub>c</sub> interval have been associated with the occurrence of torsade de pointes and with sudden unexplained death. The relationship of QT prolongation to torsade de pointes is clearest for larger increases (20 msec and greater) but it is possible that smaller QT/QT<sub>c</sub> prolongations may also increase risk, or increase it in susceptible individuals. Although torsade de pointes has not been observed in association with the use of ziprasidone in premarketing studies and experience is too limited to rule out an increased risk, there have been rare post-marketing reports (in the presence of multiple confounding factors) (see **ADVERSE REACTIONS**). A study evaluating the QT/QT<sub>c</sub> prolonging effect of intramuscular ziprasidone, with intramuscular haloperidol as a control, was conducted in patient volunteers. In the trial, ECGs were obtained at the time of maximum plasma concentration following two injections of ziprasidone (20 mg then 30 mg) or haloperidol (7.5 mg then 10 mg) given four hours apart. Note that a 30 mg dose of intramuscular ziprasidone is 50% higher than the recommended therapeutic dose. The mean change in QT<sub>c</sub> from baseline was calculated for each drug, using a sample-based correction that removes the effect of heart rate on the QT interval. The mean increase in QT<sub>c</sub> from baseline for ziprasidone was 4.6 msec following the first injection and 12.8 msec following the second injection. The mean increase in QT<sub>c</sub> from baseline for haloperidol was 6.0 msec following the first injection and 14.7 msec following the second injection. In this study, no patients had a QT<sub>c</sub> interval exceeding 500 msec. As with other antipsychotic drugs and placebo, sudden unexplained deaths have been reported in patients taking ziprasidone at recommended doses. The premarketing experience for ziprasidone did not reveal an excess risk of mortality for ziprasidone compared to other antipsychotic drugs or placebo, but the extent of exposure was limited, especially for the drugs used as active controls and placebo. Nevertheless, ziprasidone's larger prolongation of QT<sub>c</sub> length compared to several other antipsychotic drugs raises the possibility that the risk of sudden death may be greater for ziprasidone than for other available drugs for treating schizophrenia. This possibility needs to be considered in deciding among alternative drug products. Certain circumstances may increase the risk of the occurrence of torsade de pointes and/or sudden death in association with the use of drugs that prolong the QT<sub>c</sub> interval, including (1) bradycardia; (2) hypokalemia or hypomagnesemia; (3) concomitant use of other drugs that prolong the QT<sub>c</sub> interval; and (4) presence of congenital prolongation of the QT interval. **Electrolyte Disturbances May Increase The Risk of QT Prolongation** It is recommended that patients being considered for ziprasidone treatment who are at risk for significant electrolyte disturbances, hypokalemia in particular, have baseline serum potassium and magnesium measurements. Hypokalemia (and/or hypomagnesemia) may increase the risk of QT prolongation and arrhythmia. Hypokalemia may result from diuretic therapy, diarrhea, and other causes. Patients with low serum potassium and/or magnesium should be repleted with those electrolytes before proceeding with treatment. It is essential to periodically monitor serum electrolytes in patients for whom diuretic therapy is introduced during ziprasidone treatment. Persistently prolonged QT<sub>c</sub> intervals may also increase the risk of further prolongation and arrhythmia, but it is not clear that routine screening ECG measures are effective in detecting such patients. Rather, ziprasidone should be avoided in patients with histories of significant cardiovascular illness, e.g., QT prolongation, recent acute myocardial infarction, uncompensated heart failure, or cardiac arrhythmia. Ziprasidone should be discontinued in patients who are found to have persistent QT<sub>c</sub> measurements >500 msec. **Neuroleptic Malignant Syndrome (NMS)** A potentially fatal symptom complex sometimes referred to as Neuroleptic Malignant Syndrome (NMS) has been reported in association with administration of antipsychotic drugs. The management of NMS should include: (1) immediate discontinuation of antipsychotic drugs and other drugs not essential to concurrent therapy; (2) intensive symptomatic treatment and medical monitoring; and (3) treatment of any concomitant serious medical problems for which specific treatments are available. If a patient requires antipsychotic drug treatment after recovery from NMS, the potential reintroduction

of drug therapy should be carefully considered. The patient should be carefully monitored, since recurrences of NMS have been reported. **Tardive Dyskinesia** A syndrome of potentially irreversible, involuntary, dyskinetic movements may develop in patients undergoing treatment with antipsychotic drugs. Although the prevalence of the syndrome appears to be highest among the elderly, especially elderly women, it is impossible to rely upon prevalence estimates to predict, at the inception of antipsychotic treatment, which patients are likely to develop the syndrome. If signs and symptoms of tardive dyskinesia appear in a patient on ziprasidone, drug discontinuation should be considered. **Hyperglycemia and Diabetes Mellitus** Hyperglycemia-related adverse events, sometimes serious, have been reported in patients treated with atypical anti-psychotics. There have been few reports of hyperglycemia or diabetes in patients treated with GEODON, and it is not known if GEODON is associated with these events. Any patient treated with atypical antipsychotics should be monitored for symptoms of hyperglycemia.

## PRECAUTIONS

**Leukopenia, Neutropenia, and Agranulocytosis** In clinical trial and postmarketing experience, events of leukopenia/neutropenia and agranulocytosis (including fatal cases) have been reported temporally related to antipsychotic agents. Possible risk factors for leukopenia/neutropenia include pre-existing low white blood cell count (WBC) and history of drug induced leukopenia/neutropenia. Patients with a pre-existing low WBC or a history of drug induced leukopenia/neutropenia should have their complete blood count (CBC) monitored frequently during the first few months of therapy and should discontinue GEODON at the first sign of decline in WBC in the absence of other causative factors. Patients with neutropenia should be carefully monitored for fever or other symptoms or signs of infection and treated promptly if such symptoms or signs occur. Patients with severe neutropenia (absolute neutrophil count <1000/mm<sup>3</sup>) should discontinue GEODON and have their WBC followed until recovery. **Rash** In premarketing trials with ziprasidone, about 5% of patients developed rash and/or urticaria, with discontinuation of treatment in about one-sixth of these cases. The occurrence of rash was related to dose of ziprasidone, although the finding might also be explained by the longer exposure time in the higher dose patients. Several patients with rash had signs and symptoms of associated systemic illness, e.g., elevated WBCs. Most patients improved promptly with adjunctive treatment with antihistamines or steroids and/or upon discontinuation of ziprasidone, and all patients experiencing these reactions were reported to recover completely. Upon appearance of rash for which an alternative etiology cannot be identified, ziprasidone should be discontinued. **Orthostatic Hypotension** Ziprasidone may induce orthostatic hypotension associated with dizziness, tachycardia, and, in some patients, syncope, especially during the initial dose-titration period, probably reflecting its  $\alpha_1$ -adrenergic antagonist properties. Syncope was reported in 0.6% of the patients treated with ziprasidone. Ziprasidone should be used with particular caution in patients with known cardiovascular disease (history of myocardial infarction or ischemic heart disease, heart failure or conduction abnormalities), cerebrovascular disease, or conditions which would predispose patients to hypotension (dehydration, hypovolemia, and treatment with antihypertensive medications). **Seizures** In clinical trials, seizures occurred in 0.4% of patients treated with ziprasidone. There were confounding factors that may have contributed to the occurrence of seizures in many of these cases. As with other antipsychotic drugs, ziprasidone should be used cautiously in patients with a history of seizures or with conditions that potentially lower the seizure threshold, e.g., Alzheimer's dementia. Conditions that lower the seizure threshold may be more prevalent in a population of 65 years or older. **Dysphagia** Esophageal dysmotility and aspiration have been associated with antipsychotic drug use. Aspiration pneumonia is a common cause of morbidity and mortality in elderly patients, in particular those with advanced Alzheimer's dementia, and ziprasidone and other antipsychotic drugs should be used cautiously in patients at risk for aspiration pneumonia (see **BOXED WARNING** and **Increased Mortality in Elderly Patients with Dementia-Related Psychosis in WARNINGS**). **Hyperprolactinemia** As with other drugs that antagonize dopamine D<sub>2</sub> receptors, ziprasidone elevates prolactin levels in humans. Tissue culture experiments indicate that approximately one-third of human breast cancers are prolactin-dependent *in vitro*, a factor of potential importance if the prescription of these drugs is contemplated in a patient with previously detected breast cancer. Neither clinical studies nor epidemiologic studies conducted to date have shown an association between chronic

administration of this class of drugs and tumorigenesis in humans; the available evidence is considered too limited to be conclusive at this time. **Potential for Cognitive and Motor Impairment** Somnolence was a commonly reported adverse reaction in patients treated with ziprasidone. In the 4- and 6-week placebo-controlled trials, somnolence was reported in 14% of patients on ziprasidone compared to 7% of placebo patients. Somnolence led to discontinuation in 0.3% of patients in short-term clinical trials. Since ziprasidone has the potential to impair judgment, thinking, or motor skills, patients should be cautioned about performing activities requiring mental alertness, such as operating a motor vehicle (including automobiles) or operating hazardous machinery until they are reasonably certain that ziprasidone therapy does not affect them adversely. **Priapism** One case of priapism was reported in the premarketing database. **Body Temperature Regulation** Although not reported with ziprasidone in premarketing trials, disruption of the body's ability to reduce core body temperature has been attributed to antipsychotic agents. **Suicide** The possibility of a suicide attempt is inherent in psychotic illness and close supervision of high-risk patients should accompany drug therapy. Prescriptions for ziprasidone should be written for the smallest quantity of capsules consistent with good patient management in order to reduce overdose risk. **Patients With Concomitant Illnesses** Clinical experience with ziprasidone in patients with certain concomitant systemic illnesses is limited. Ziprasidone has not been evaluated or used to any appreciable extent in patients with a recent history of myocardial infarction or unstable heart disease. Patients with these diagnoses were excluded from premarketing clinical studies. Because of the risk of QT<sub>c</sub> prolongation and orthostatic hypotension with ziprasidone, caution should be observed in cardiac patients (see **QT Prolongation and Risk of Sudden Death** in **WARNINGS** and **Orthostatic Hypotension** in **PRECAUTIONS**). **Information for Patients** To assure safe and effective use of GEODON, the information and instructions provided in the patient information should be discussed with patients. **Laboratory Tests** Patients being considered for ziprasidone treatment who are at risk of significant electrolyte disturbances should have baseline serum potassium and magnesium measurements. Low serum potassium and magnesium should be replaced before proceeding with treatment. Patients who are started on diuretics during Ziprasidone therapy need periodic monitoring of serum potassium and magnesium. Discontinue ziprasidone in patients who are found to have persistent QT<sub>c</sub> measurements >500 msec (see **WARNINGS**).

## DRUG INTERACTIONS

(1) Ziprasidone should not be used with any drug that prolongs the QT interval. (2) Given the primary CNS effects of ziprasidone, caution should be used when it is taken in combination with other centrally acting drugs. (3) Because of its potential for inducing hypotension, ziprasidone may enhance the effects of certain antihypertensive agents. (4) Ziprasidone may antagonize the effects of levodopa and dopamine agonists. **Effect of Other Drugs on Ziprasidone** *Carbamazepine*, 200 mg bid for 21 days, resulted in a decrease of approximately 35% in the AUC of ziprasidone. Ketoconazole, a potent inhibitor of CYP3A4, 400 mg qd for 5 days, increased the AUC and C<sub>max</sub> of ziprasidone by about 35-40%. *Cimetidine*, 800 mg qd for 2 days, did not affect ziprasidone pharmacokinetics. Co-administration of 30 mL of Maalox® did not affect ziprasidone pharmacokinetics. Population pharmacokinetic analysis of schizophrenic patients enrolled in controlled clinical trials has not revealed evidence of any clinically significant pharmacokinetic interactions with benzotropine, propranolol, or lorazepam. **Effect of Ziprasidone on Other Drugs** *In vitro* studies revealed little potential for ziprasidone to interfere with the metabolism of drugs cleared primarily by CYP1A2, CYP2C9, CYP2C19, CYP2D6 and CYP3A4, and little potential for drug interactions with ziprasidone due to displacement. Ziprasidone 40 mg bid administered concomitantly with *lithium* 450 mg bid for 7 days did not affect the steady-state level or renal clearance of lithium. *In vivo* studies have revealed no effect of ziprasidone on the pharmacokinetics of estrogen or progesterone components. Ziprasidone 20 mg bid did not affect the pharmacokinetics of concomitantly administered *oral contraceptives*, ethinyl estradiol (0.03 mg) and levonorgestrel (0.15 mg). Consistent with *in vitro* results, a study in normal healthy volunteers showed that ziprasidone did not alter the metabolism of *dextromethorphan*, a CYP2D6 model substrate, to its major metabolite, dextrophan. There was no statistically significant change in the urinary dextromethorphan/dextrophan ratio.

## NONCLINICAL TOXICOLOGY

**Carcinogenesis, Mutagenesis, Impairment of Fertility** Lifetime carcinogenicity studies were conducted with ziprasidone in Long Evans rats and CD-1 mice. In male mice, there was no increase in incidence of tumors relative to controls. In female mice, there were dose-related increases in the incidences of pituitary gland adenoma and carcinoma, and mammary gland adenocarcinoma at all doses tested. Increases in serum prolactin were observed in a 1-month dietary study in female, but not male, mice. Ziprasidone had no effect on serum prolactin in rats in a 5-week dietary study at the doses that were used in the carcinogenicity study. The relevance for human risk of the findings of prolactin-mediated endocrine tumors in rodents is unknown (see **Hyperprolactinemia** in **PRECAUTIONS**). **Mutagenesis:** There was a reproducible mutagenic response in the Ames assay in one strain of *S. typhimurium* in the absence of metabolic activation. Positive results were obtained in both the *in vitro* mammalian cell gene mutation assay and the *in vitro* chromosomal aberration assay in human lymphocytes. **Impairment of Fertility:** Ziprasidone increase time to copulation in Sprague-Dawley rats in two fertility and early embryonic development studies at doses of 10 to 160 mg/kg/day (0.5 to 8 times the MRHD of 200 mg/day on a mg/m<sup>2</sup> basis). Fertility rate was reduced at 160 mg/kg/day (8 times the MRHD on a mg/m<sup>2</sup> basis). There was no effect on fertility at 40 mg/kg/day (2 times the MRHD on a mg/m<sup>2</sup> basis). The fertility of female rats was reduced.

## USE IN SPECIFIC POPULATIONS

**Pregnancy** *Pregnancy Category C:* There are no adequate and well-controlled studies in pregnant women. Ziprasidone should be used during pregnancy only if the potential benefit justifies the potential risk to the fetus. **Labor and Delivery** The effect of ziprasidone on labor and delivery in humans is unknown. **Nursing Mothers** It is not known whether ziprasidone or its metabolites are excreted in human milk. It is recommended that women receiving ziprasidone should not breastfeed. **Pediatric Use** The safety and effectiveness of ziprasidone in pediatric patients have not been established. **Geriatric Use** Of the total number of subjects in clinical studies of ziprasidone, 2.4 percent were 65 and over. No overall differences in safety or effectiveness were observed between these subjects and younger subjects. Nevertheless, the presence of multiple factors that might increase the pharmacodynamic response to ziprasidone, or cause poorer tolerance or orthostasis, should lead to consideration of a lower starting dose, slower titration, and careful monitoring during the initial dosing period for some elderly patients.

## ADVERSE REACTIONS

**Adverse Findings Observed in Short-term, Placebo-Controlled Trials** The following findings are based on the short-term placebo-controlled premarketing trials for schizophrenia (a pool of two 6-week, and two 4-week fixed-dose trials) and bipolar mania (a pool of two 3-week flexible-dose trials) in which GEODON was administered in doses ranging from 10 to 200 mg/day. **Adverse Events Associated With Discontinuation** *Schizophrenia:* Approximately 4.1% (29/702) of ziprasidone-treated patients in short-term, placebo-controlled studies discontinued treatment due to an adverse reaction, compared with about 2.2% (6/273) on placebo. The most common reaction associated with dropout was rash, including 7 dropouts for rash among ziprasidone patients (1%) compared to no placebo patients (see **PRECAUTIONS**). *Bipolar Mania:* Approximately 6.5% (18/279) of ziprasidone-treated patients in short-term, placebo-controlled studies discontinued treatment due to an adverse reaction, compared with about 3.7% (5/136) on placebo. The most common reactions associated with dropout in the ziprasidone-treated patients were akathisia, anxiety, depression, dizziness, dystonia, rash and vomiting, with 2 dropouts for each of these reactions among ziprasidone patients (1%) compared to one placebo patient each for dystonia and rash (1%) and no placebo patients for the remaining adverse events. **Adverse Events at an Incidence of ≥5% and at Least Twice the Rate of Placebo** The most commonly observed adverse events associated with GEODON in schizophrenia trials were somnolence (14%) and respiratory tract infection (8%). The most commonly observed adverse events associated with the use of GEODON in bipolar mania trials were somnolence (31%), extrapyramidal symptoms (31%), dizziness (16%), akathisia (10%), abnormal vision (6%), asthenia (6%), and vomiting (5%). The following list enumerates the treatment-emergent adverse events that occurred during acute therapy, including only those events that

occurred in 2% of GEODON patients and at a greater incidence than in placebo. Schizophrenia: *Body as a Whole*—asthenia, accidental injury, chest pain. *Cardiovascular*—tachycardia. *Digestive*—nausea, constipation, dyspepsia, diarrhea, dry mouth, anorexia. *Nervous*—extrapyramidal symptoms, somnolence, akathisia, dizziness. *Respiratory*—respiratory tract infection, rhinitis, cough increased. *Skin and Appendages*—rash, fungal dermatitis. *Special Senses*—abnormal vision. Bipolar Mania: *Body as a Whole*—headache, asthenia, accidental injury. *Cardiovascular*—hypertension. *Digestive*—nausea, diarrhea, dry mouth, vomiting, increased salivation, tongue edema, dysphagia. *Musculoskeletal*—myalgia. *Nervous*—somnolence, extrapyramidal symptoms, dizziness, akathisia, anxiety, hypesthesia, speech disorder. *Respiratory*—pharyngitis, dyspnea. *Skin and Appendages*—fungal dermatitis. *Special Senses*—abnormal vision. **Dose Dependency** An analysis for dose response in the schizophrenia 4-study pool revealed an apparent relation of adverse reaction to dose for the following reactions: asthenia, postural hypotension, anorexia, dry mouth, increased salivation, arthralgia, anxiety, dizziness, dystonia, hypertonia, somnolence, tremor, rhinitis, rash, and abnormal vision. **Extrapyramidal Symptoms (EPS)** The incidence of reported EPS for ziprasidone patients in the short-term, placebo-controlled schizophrenia trials was 14% vs. 8% for placebo. Objectively collected data from those trials on the Simpson-Angus Rating Scale (for EPS) and the Barnes Akathisia Scale (for akathisia) did not generally show a difference between ziprasidone and placebo. **Dystonia** Symptoms of dystonia, prolonged abnormal contractions of muscle groups, may occur in susceptible individuals during the first few days of treatment. While these symptoms can occur at low doses, they occur more frequently and with greater severity with high potency and at higher doses of first generation antipsychotic drugs. Elevated risk of acute dystonia is observed in males and younger age groups. **Vital Sign Changes** Ziprasidone is associated with orthostatic hypotension (see **PRECAUTIONS**). **Weight Gain** In short-term schizophrenia trials, the proportions of patients meeting a weight gain criterion of  $\geq 7\%$  of body weight were compared, revealing a statistically significantly greater incidence of weight gain for ziprasidone (10%) compared to placebo (4%). A median weight gain of 0.5 kg was observed in ziprasidone patients compared to no median weight change in placebo patients. Weight gain was reported as an adverse event in 0.4% of both ziprasidone and placebo patients. During long-term therapy with ziprasidone, a categorization of patients at baseline on the basis of body mass index (BMI) revealed the greatest mean weight gain and highest incidence of clinically significant weight gain ( $>7\%$  of body weight) in patients with low BMI ( $<23$ ) compared to normal (23-27) or overweight patients ( $>27$ ). There was a mean weight gain of 1.4 kg for those patients with a “low” baseline BMI, no mean change for patients with a “normal” BMI, and a 1.3 kg mean weight loss for patients who entered the program with a “high” BMI. **ECG Changes** Ziprasidone is associated with an increase in the QT<sub>c</sub> interval (see **WARNINGS**). In the schizophrenia trials, ziprasidone was associated with a mean increase in heart rate of 1.4 beats per minute compared to a 0.2 beats per minute decrease among placebo patients. **Other Adverse Events Observed During the Premarketing Evaluation of Ziprasidone in Schizophrenia** Frequent adverse events are those occurring in at least 1/100 patients; infrequent adverse events are those occurring in 1/100 to 1/1000 patients; rare adverse events are those occurring in fewer than 1/1000 patients. *Body as a Whole*—Frequent: abdominal pain, flu syndrome, fever, accidental fall, face edema, chills, photosensitivity reaction, flank pain, hypothermia, motor vehicle accident. *Cardiovascular System*—Frequent: tachycardia, hypertension, postural hypotension. Infrequent: bradycardia, angina pectoris, atrial fibrillation. Rare: first degree AV block, bundle branch block, phlebitis, pulmonary embolus, cardiomegaly, cerebral infarct, cerebrovascular accident, deep thrombophlebitis, myocarditis, thrombophlebitis. *Digestive System*—Frequent: anorexia, vomiting. Infrequent: rectal hemorrhage, dysphagia, tongue edema. Rare: gum hemorrhage, jaundice, fecal impaction, gamma glutamyl trans-peptidase increased, hematemesis, cholestatic jaundice, hepatitis, hepatomegaly, leukoplakia of mouth, fatty liver deposit, melena. *Endocrine*—Rare: hypothyroidism, hyperthyroidism, thyroiditis. *Hemic and Lymphatic System*—Infrequent: anemia, ecchymosis, leukocytosis, leukopenia, eosinophilia, lymphadenopathy. Rare: thrombocytopenia, hypochromic anemia, lymphocytosis, monocytosis, basophilia, lymphedema, polycythemia, thrombocythemia. *Metabolic and Nutritional Disorders*—Infrequent: thirst, transaminase increased, peripheral edema, hyperglycemia, creatine phosphokinase

increased, alkaline phosphatase increased, hypercholesteremia, dehydration, lactic dehydrogenase increased, albuminuria, hypokalemia. Rare: BUN increased, creatinine increased, hyperlipemia, hypocholesteremia, hyperkalemia, hypochloremia, hypoglycemia, hyponatremia, hypoproteinemia, glucose tolerance decreased, gout, hyperchloremia, hyperuricemia, hypocalcemia, hypoglycemic reaction, hypomagnesemia, ketosis, respiratory alkalosis. *Musculoskeletal System*—Frequent: myalgia. Infrequent: tenosynovitis. Rare: myopathy. *Nervous System*—Frequent: agitation, extrapyramidal syndrome, tremor, dystonia, hypertonia, dyskinesia, hostility, twitching, paresthesia, confusion, vertigo, hypokinesia, hyperkinesia, abnormal gait, oculogyric crisis, hypesthesia, ataxia, amnesia, cogwheel rigidity, delirium, hypotonia, akinesia, dysarthria, withdrawal syndrome, buccoglossal syndrome, choreoathetosis, diplopia, incoordination, neuropathy. Infrequent: paralysis. Rare: myoclonus, nystagmus, torticollis, circumoral paresthesia, opisthotonos, reflexes increased, trismus. *Respiratory System*—Frequent: dyspnea. Infrequent: pneumonia, epistaxis. Rare: hemoptysis, laryngismus. *Skin and Appendages*—Infrequent: maculopapular rash, urticaria, alopecia, eczema, exfoliative dermatitis, contact dermatitis, vesiculobullous rash. *Special Senses*—Frequent: fungal dermatitis. Infrequent: conjunctivitis, dry eyes, tinnitus, blepharitis, cataract, photophobia. Rare: eye hemorrhage, visual field defect, keratitis, keratoconjunctivitis. *Urogenital System*—Infrequent: impotence, abnormal ejaculation, amenorrhea, hematuria, menorrhagia, female lactation, polyuria, urinary retention, metrorrhagia, male sexual dysfunction, anorgasmia, glycosuria. Rare: gynecomastia, vaginal hemorrhage, nocturia, oliguria, female sexual dysfunction, uterine hemorrhage. **Adverse Findings Observed in Trials of Intramuscular Ziprasidone** In these studies, the most commonly observed adverse reactions associated with the use of intramuscular ziprasidone ( $\geq 5\%$ ) and observed at a rate on intramuscular ziprasidone (in the higher dose groups) at least twice that of the lowest intramuscular ziprasidone group were headache (13%), nausea (12%), and somnolence (20%). **Adverse Events at an Incidence of  $\geq 1\%$  in Short-Term Fixed-Dose Intramuscular Trials** The following list enumerates the treatment-emergent adverse events that occurred in  $\geq 1\%$  of patients during acute therapy with intramuscular ziprasidone: *Body as a Whole*—headache, injection site pain, asthenia, abdominal pain, flu syndrome, back pain. *Cardiovascular*—postural hypotension, hypertension, bradycardia, vasodilation. *Digestive*—nausea, rectal hemorrhage, diarrhea, vomiting, dyspepsia, anorexia, constipation, tooth disorder, dry mouth. *Nervous*—dizziness, anxiety, insomnia, somnolence, akathisia, agitation, extrapyramidal syndrome, hypertonia, cogwheel rigidity, paresthesia, personality disorder, psychosis, speech disorder. *Respiratory*—rhinitis. *Skin and Appendages*—furunculosis, sweating. *Urogenital*—dysmenorrhea, priapism. **Other Events Observed During Post-marketing Use** Adverse reaction reports not listed above that have been received since market introduction include rare occurrences of the following—*Cardiac Disorders*: Tachycardia, torsade de pointes (in the presence of multiple confounding factors), (see **WARNINGS**); *Digestive System Disorders*: Swollen Tongue; *Reproductive System and Breast Disorders*: Galactorrhea, priapism; *Nervous System Disorders*: Facial Droop, neuroleptic malignant syndrome, serotonin syndrome (alone or in combination with serotonergic medicinal products), tardive dyskinesia; *Psychiatric Disorders*: Insomnia, mania/hypomania; *Skin and subcutaneous Tissue Disorders*: Allergic reaction (such as allergic dermatitis, angioedema, orofacial edema, urticaria), rash; *Urogenital System Disorders*: Enuresis, urinary incontinence; *Vascular Disorders*: Postural hypotension, syncope.

## DRUG ABUSE AND DEPENDENCE

**Controlled Substance Class** Ziprasidone is not a controlled substance.

## OVERDOSAGE

In premarketing trials in over 5400 patients, accidental or intentional overdosage of oral ziprasidone was documented in 10 patients. All patients survived without sequelae. In the patient taking the largest confirmed amount (3240 mg), the only symptoms reported were minimal sedation, slurring of speech, and transitory hypertension (200/95).

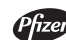

## BIPOLAR I MAINTENANCE TREATMENT

# GEODON + LITHIUM OR VALPROATE PROVEN SUPERIOR TO LITHIUM OR VALPROATE ALONE IN PREVENTING RELAPSE

## GEODON<sup>®</sup> (ziprasidone HCl) Capsules

GEODON is indicated for acute treatment as monotherapy of manic or mixed episodes associated with bipolar I disorder and for maintenance treatment of bipolar I disorder as an adjunct to lithium or valproate. For full symptoms and diagnostic criteria, see the *DSM-IV-TR*<sup>®</sup> (2000).

### IMPORTANT SAFETY INFORMATION

**Elderly patients with dementia-related psychosis treated with antipsychotic drugs are at an increased risk of death compared to placebo. GEODON is not approved for the treatment of patients with dementia-related psychosis.**

GEODON is contraindicated in patients with a known history of QT prolongation, recent acute myocardial infarction, or uncompensated heart failure, and should not be used with certain other QT-prolonging drugs. GEODON has a greater capacity to prolong the QT<sub>c</sub> interval than several antipsychotics. In some drugs, QT prolongation has been associated with torsade de pointes, a potentially fatal arrhythmia. In many cases this would lead to the conclusion that other drugs should be tried first. Hypokalemia may increase the risk of QT prolongation and arrhythmia.

As with all antipsychotic medications, a rare and potentially fatal condition known as neuroleptic malignant syndrome (NMS) has been reported with GEODON. NMS can cause hyperpyrexia, muscle rigidity, diaphoresis, tachycardia, irregular pulse or blood pressure, cardiac dysrhythmia, and altered mental status. If signs and symptoms appear, immediate discontinuation, treatment, and monitoring are recommended.

Prescribing should be consistent with the need to minimize tardive dyskinesia (TD), a potentially irreversible dose- and duration-dependent syndrome. If signs and symptoms appear, discontinuation should be considered since TD may remit partially or completely.

Hyperglycemia-related adverse events, sometimes serious, have been reported in patients treated with atypical antipsychotics. There have been few reports of hyperglycemia or diabetes in patients treated with GEODON, and it is not known if GEODON is associated with these events. Patients treated with an atypical antipsychotic should be monitored for symptoms of hyperglycemia.

Precautions include the risk of rash, orthostatic hypotension, and seizures.

The most common adverse events associated with GEODON in bipolar mania were somnolence, extrapyramidal symptoms, dizziness, akathisia, and abnormal vision.

The most common adverse events (≥5%) associated with GEODON in the bipolar maintenance study were tremor and insomnia.

*Please see brief summary of prescribing information on adjacent page. For more information, please visit [www.pfizerpro.com/GEODON](http://www.pfizerpro.com/GEODON)*
