# THE AMERICAN JOURNAL OF PSYCHIATRY

## EDITOR-IN-CHIEF

Robert Freedman, M.D.

## DEPUTY EDITORS

David A. Lewis, M.D.

Robert Michels, M.D.

Daniel S. Pine, M.D.

Susan K. Schultz, M.D.

Carol A. Tamminga, M.D.

## EDITORIAL STAFF

### Editorial Director

Michael D. Roy

### Senior Editor/Features Writer

Jane Weaver, E.L.S.

### Senior Editor

John J. Guardiano, Ph.D.

### Production Manager

Julie C. Blair

### Graphic Designer

Steve Hennessey

### Assistant Editor

Angela Moore

### Editorial Support Services

#### Manager

Kourtney Skinner

### Editorial Assistant

Samantha Luck

### Administrative Assistant

Heidi Koch

### Assistants to the Editors

Lois Lilienthal

Laura English

Rachel Hogg

Russell A. Scholl

## ASSOCIATE EDITORS

Kathleen T. Brady, M.D., Ph.D.

David A. Brent, M.D.

Linda Brzustowicz, M.D.

Cameron S. Carter, M.D.

Howard H. Goldman, M.D., Ph.D.

Daniel C. Javitt, M.D.

Bankole Johnson, M.D.

Ellen Leibenluft, M.D.

Jeffrey A. Lieberman, M.D.

Barbara Milrod, M.D.

Maria A. Oquendo, M.D.

Jerrold F. Rosenbaum, M.D.

A. John Rush, M.D.

Larry J. Siever, M.D.

Patricia Suppes, M.D., Ph.D.

Myrna M. Weissman, Ph.D.

## EDITOR EMERITA

Nancy C. Andreasen, M.D., Ph.D.

## FORMER EDITORS

Amariah Brigham, M.D.  
1844-1849

T. Romeyn Beck, M.D.  
1849-1854

John P. Gray, M.D.  
1854-1886

G. Alder Blumer, M.D.  
1886-1894

Richard Dewey, M.D.  
1894-1897

Henry M. Hurd, M.D.  
1897-1904

Edward N. Brush, M.D.  
1904-1931

Clarence B. Farrar, M.D.  
1931-1965

Francis J. Braceland, M.D.  
1965-1978

John C. Nemiah, M.D.  
1978-1993

The American Journal of Psychiatry in online at [ajp.psychiatryonline.org](http://ajp.psychiatryonline.org)

# THE AMERICAN PSYCHIATRIC ASSOCIATION

1000 Wilson Blvd., Suite 1825, Arlington, VA 22209-3901  
(888) 357-7924 (toll-free inside the U.S. and Canada) / (703) 907-7300  
web site: [www.psych.org/](http://www.psych.org/) e-mail: [apa@psych.org](mailto:apa@psych.org)

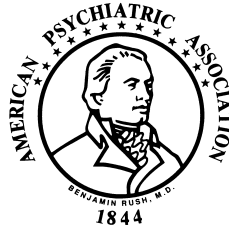

## OFFICERS 2010–2011

|                 |                                 |
|-----------------|---------------------------------|
| President       | Carol A. Bernstein, M.D.        |
| President-Elect | John M. Oldham, M.D.            |
| Vice-President  | Jeffrey L. Geller, M.D., M.P.H. |
| Treasurer       | David Fassler, M.D.             |
| Secretary       | Roger Peele, M.D.               |

## ASSEMBLY

|               |                           |
|---------------|---------------------------|
| Speaker       | Bruce A. Hershfield, M.D. |
| Speaker-Elect | Ann Marie Sullivan, M.D.  |
| Recorder      | R. Scott Benson, M.D.     |

## MEDICAL DIRECTOR'S OFFICE

|                          |                            |
|--------------------------|----------------------------|
| Medical Director and CEO | James H. Scully, Jr., M.D. |
|--------------------------|----------------------------|

## BOARD OF TRUSTEES

|                            |                                  |
|----------------------------|----------------------------------|
| Brian Crowley, M.D.        | Carolyn B. Robinowitz, M.D.      |
| Mary Helen Davis, M.D.     | Alan F. Schatzberg, M.D.         |
| Mark David Graff, M.D.     | Jacqueline N. Smith, M.D.        |
| Marilyn Griffin, M.D.      | Joyce A. Spurgeon, M.D.          |
| Dilip V. Jeste, M.D.       | Frederick J. Stoddard, Jr., M.D. |
| Sarah Johnson, M.D., M.Sc. | Nada L. Stotland, M.D., M.P.H.   |
| Steve Hyun Koh, M.D.       | John J. Wernert III, M.D.        |
| James E. Ninger, M.D.      | William M. Womack, M.D.          |
| Kayla M. Pope, M.D., J.D.  |                                  |

The American Journal of Psychiatry is online at [ajp.psychiatryonline.org](http://ajp.psychiatryonline.org)

# THE AMERICAN PSYCHIATRIC ASSOCIATION

## Chairpersons of Councils, Commissions, Committees, and Task Forces

### Standing Committees

---

#### Bylaws

John O. Gaston, M.D.

#### Elections

Kathleen M. Mogul, M.D.

#### Ethics

Wade C. Myers, M.D.

#### Finance and Budget

Frank W. Brown, M.D.

#### Audit

David Fassler, M.D.

#### Investment Oversight

Larry R. Faulkner, M.D.

#### Joint Reference

Carol A. Bernstein, M.D.

#### Membership

Joseph Ezra V. Rubin, M.D.

#### Nominating

Alan F. Schatzberg, M.D.

#### Tellers

Eliot Sorel, M.D.

### Council on Adult Psychiatry

---

John A. Renner, Jr., M.D.

### Council on Advocacy and Government Relations

---

Robert Paul Cabaj, M.D.

#### Advocacy and Litigation Funding

Jeffrey L. Metzner, M.D.

### Council on Children, Adolescents, and Their Families

---

Steven Paul Cuffe, M.D.

#### Agnes Purcell McGavin Award

John E. Schowalter, M.D.

#### Blanche F. Ittleson Research Award

Beth Ann Brooks, M.D.

### Council on Communications

---

Jeffrey A. Borenstein, M.D.

### Council on Healthcare Systems and Financing

---

Anita Smith Everett, M.D.

#### APA/Business Relations

Stephen H. Heidel, M.D.

#### Reimbursement for Psychiatric Care

Joseph T. English, M.D.

#### RBRVS, Codes and Reimbursement

Ronald M. Burd, M.D.

### Council on Medical Education and Lifelong Learning

---

Sandra Sexson, M.D.

#### APA/Bristol-Myers Squibb Fellowship Selection Committee

Jules M. Ranz, M.D.

#### APA/SAMHSA Minority Fellowship Selection and Advisory

Maria A. Oquendo, M.D.

#### Joint Sponsorship of Continuing Medical Education (CME)

Adam T. Kaul, M.D.

#### Scientific Program

Tana Annette Grady-Weliky, M.D.

#### Scientific Program Committee of the Institute on Psychiatric Services

Anita Smith Everett, M.D.

#### Task Force to Update the Ethics Annotations

Laura W. Roberts, M.D.

#### Vestermark Award

Kaillie R. Shaw, M.D.

### Council on Minority Health and Health Disparities

---

Sandra C. Walker, M.D.

### Council on Psychiatry And Law

---

Patricia R. Recupero, M.D., J.D.

#### Isaac Ray Award

Renee L. Binder, M.D.

#### Judicial Action

Paul S. Appelbaum, M.D.

#### Manfred S. Guttmacher Award

Marilyn Price, M.D., C.M.

### Council on Research and Quality Care

---

Jeffrey A. Lieberman, M.D.

#### Electronic Health Records

Laura J. Fochtmann, M.D.

#### Psychiatric Dimensions of Disasters

Robert J. Ursano, M.D.

#### Research Awards

Stuart C. Yudofsky, M.D.

#### Steering Committee on Practice Guidelines

Joel Yager, M.D.

#### Task Force on DSM-V

David J. Kupfer, M.D.

#### Task Force on Gender Identity Disorder

William M. Byne

#### Task Force to Revise the Practice of Electroconvulsive Therapy

Sarah H. Lisanby
